# Supplementary material for: Variation in heading date conceals quantitative trait loci for other traits of importance in breeding selection of rice
Source: PubMed Central journal article supplement — Breed Sci. 2012 Nov 1;62(3):223–34. doi: 10.1270/jsbbs.62.223 (PMC3501939; doi:10.1270/jsbbs.62.223), 2012-11-01

# Supplemental Fig. 1. Hori *et al.*

Frequency distribution for agronomic traits in the Nipponbare/Koshihikari BILs. Trait abbreviations and units of measurement used on *x*-axes are as given in Table 1. Black and white arrows indicate the mean values for Nipponbare and Koshihikari, respectively. KARC, NARO Kyushu Okinawa Agricultural Research Center; NICS, NARO Institute of Crop Science; NARCHRC, NARO Agricultural Research Center Hokuriku Research Center; MARI, Miyazaki Agricultural Research Institute; TARC, NARO Tohoku Agricultural Research Center; AARCMARI, Aichi Agricultural Research Center Mountainous Region Agricultural Research Institute.

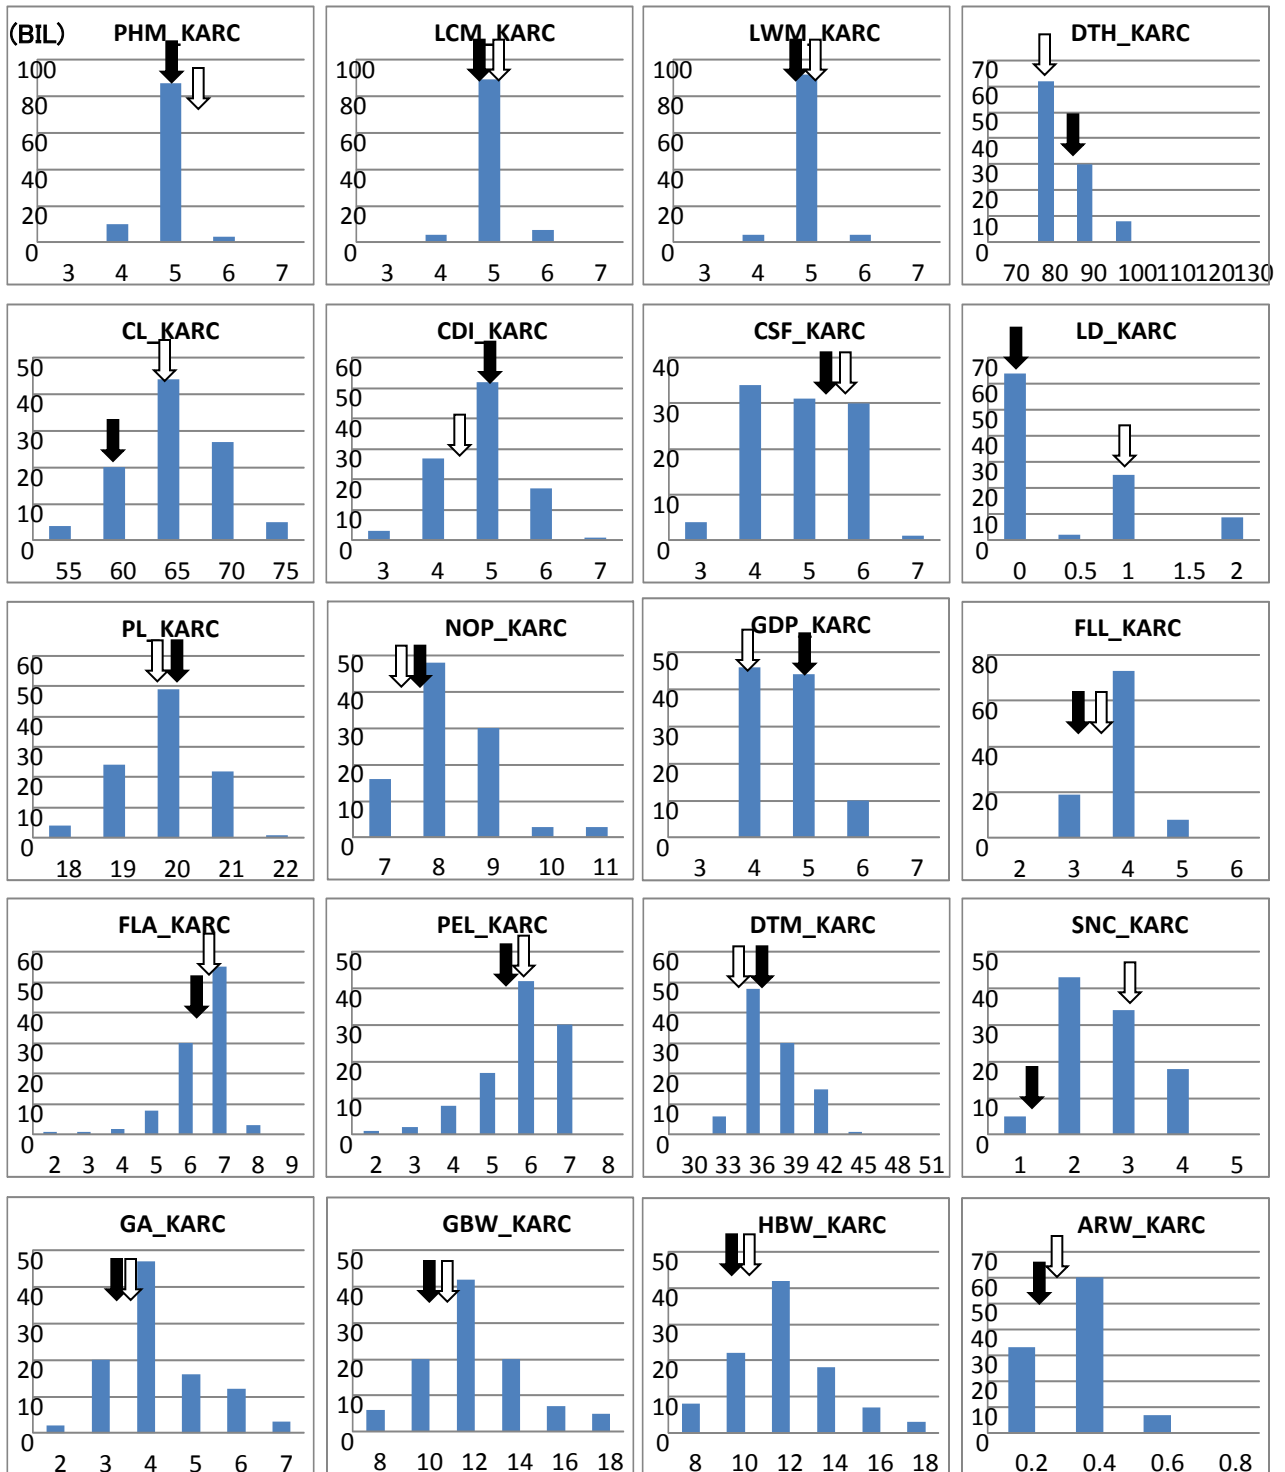

Supplemental Fig. 1 Hori *et al.* (continued).

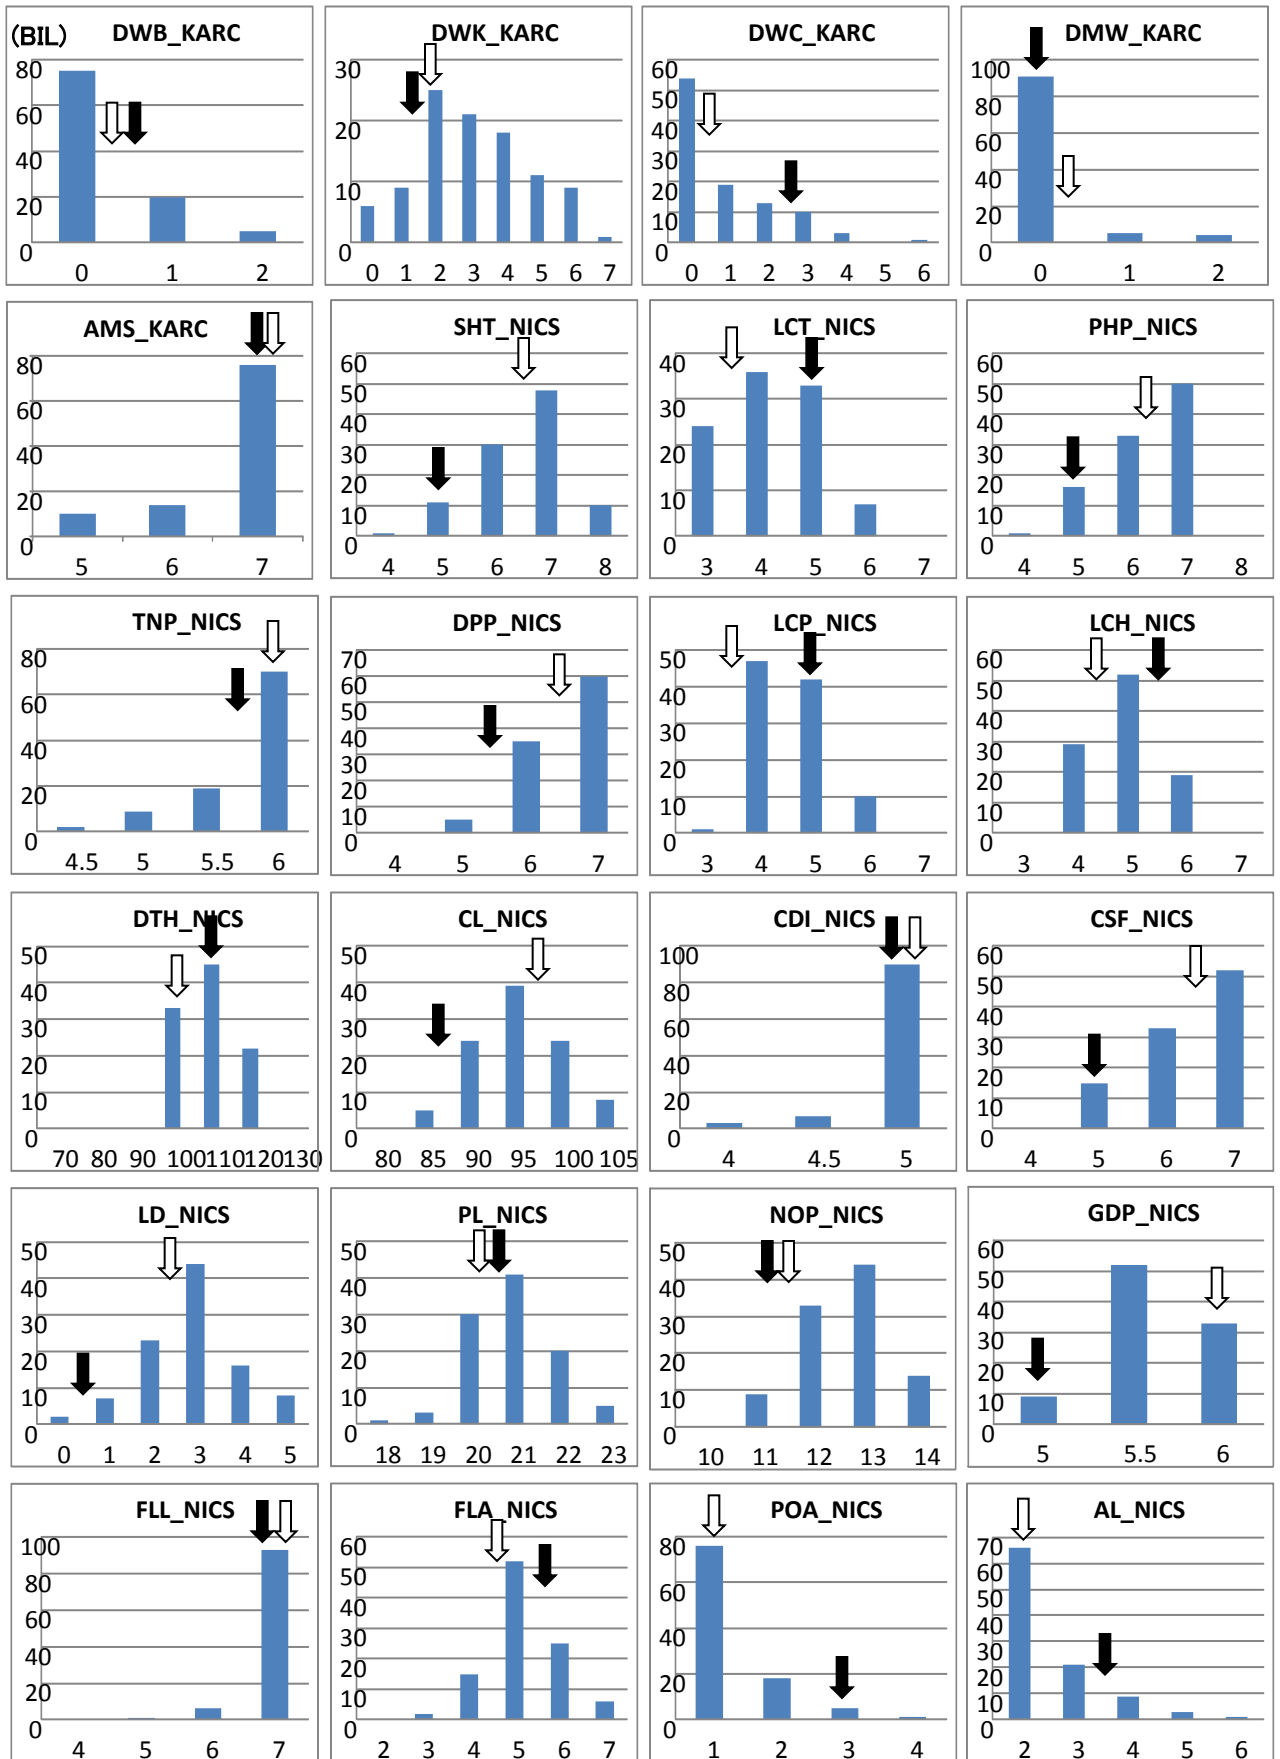

Supplemental Fig. 1 Hori *et al.* (continued).

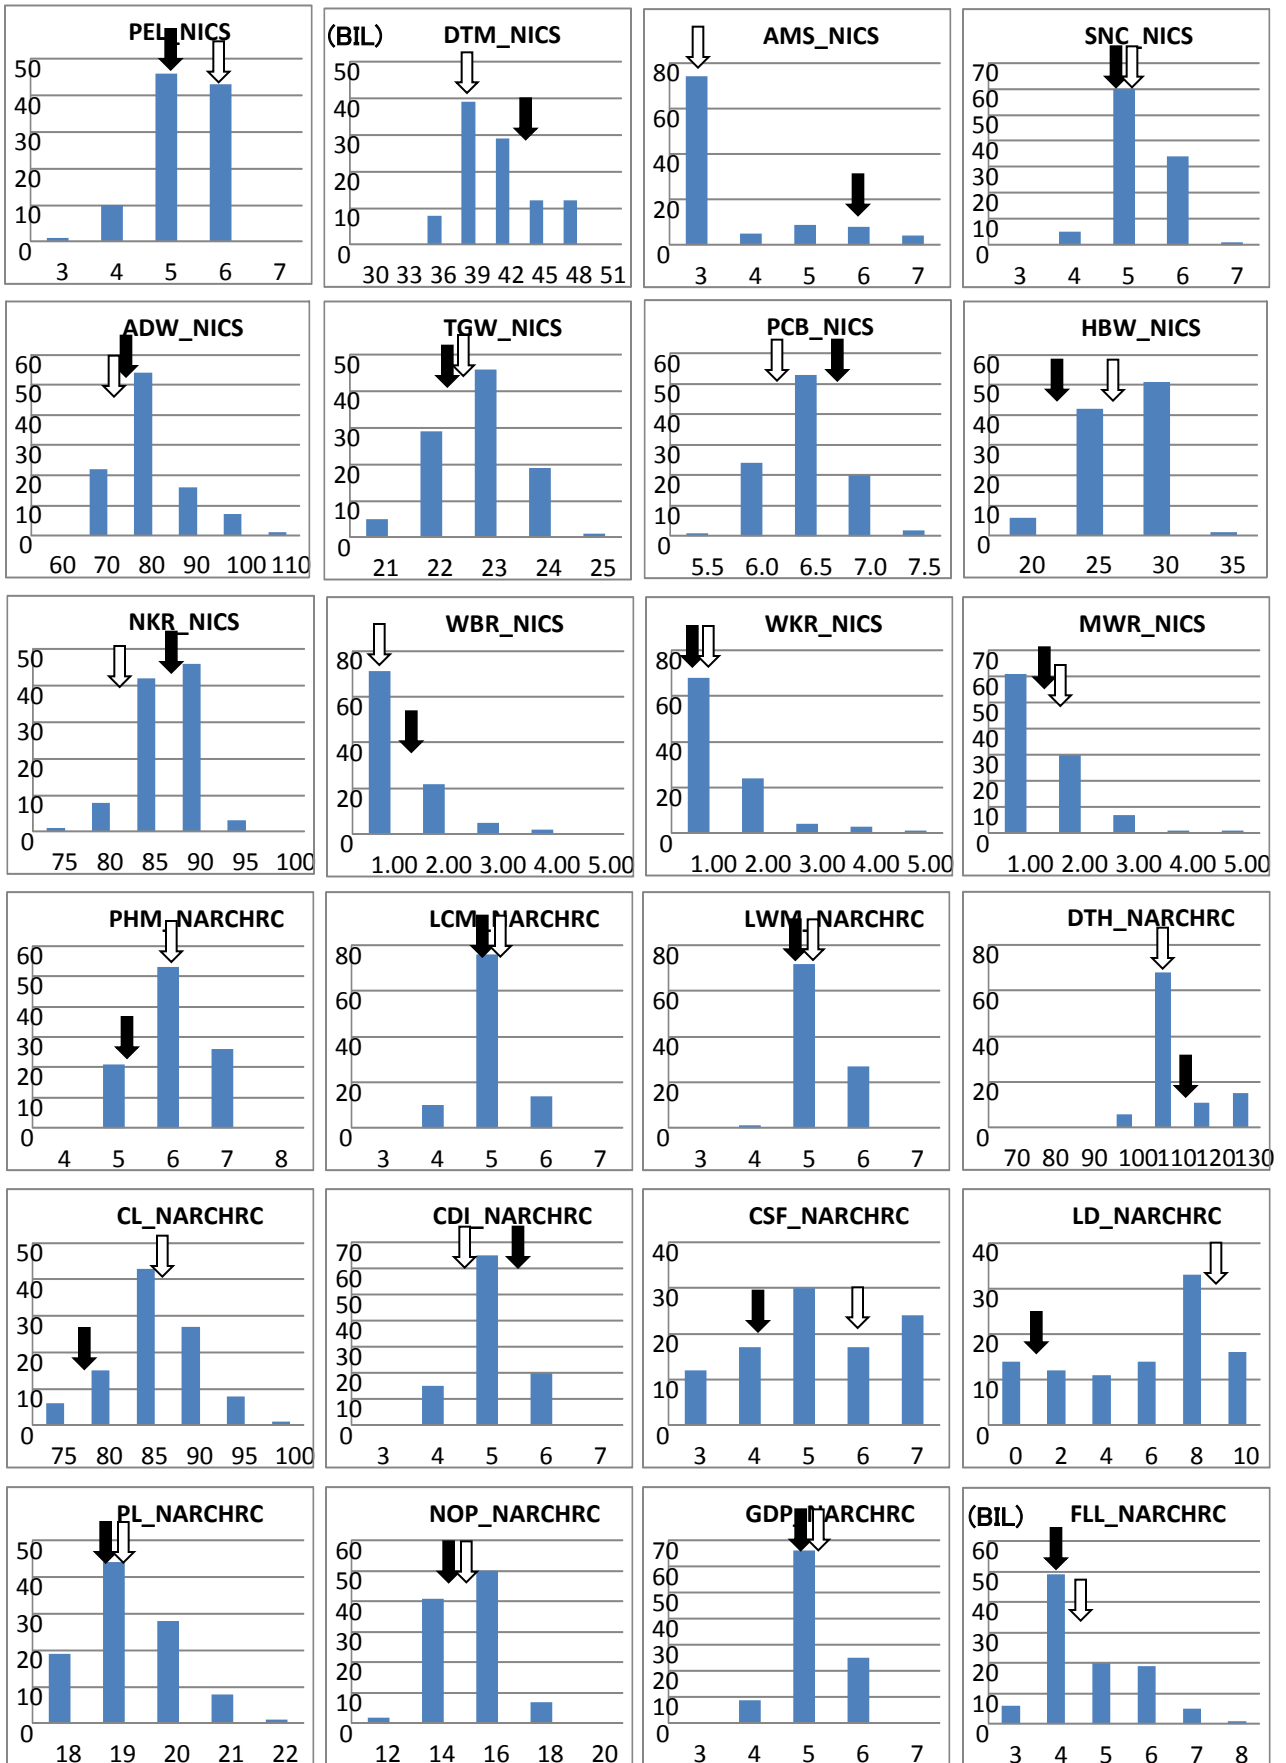

Supplemental Fig. 1 Hori *et al.* (continued).

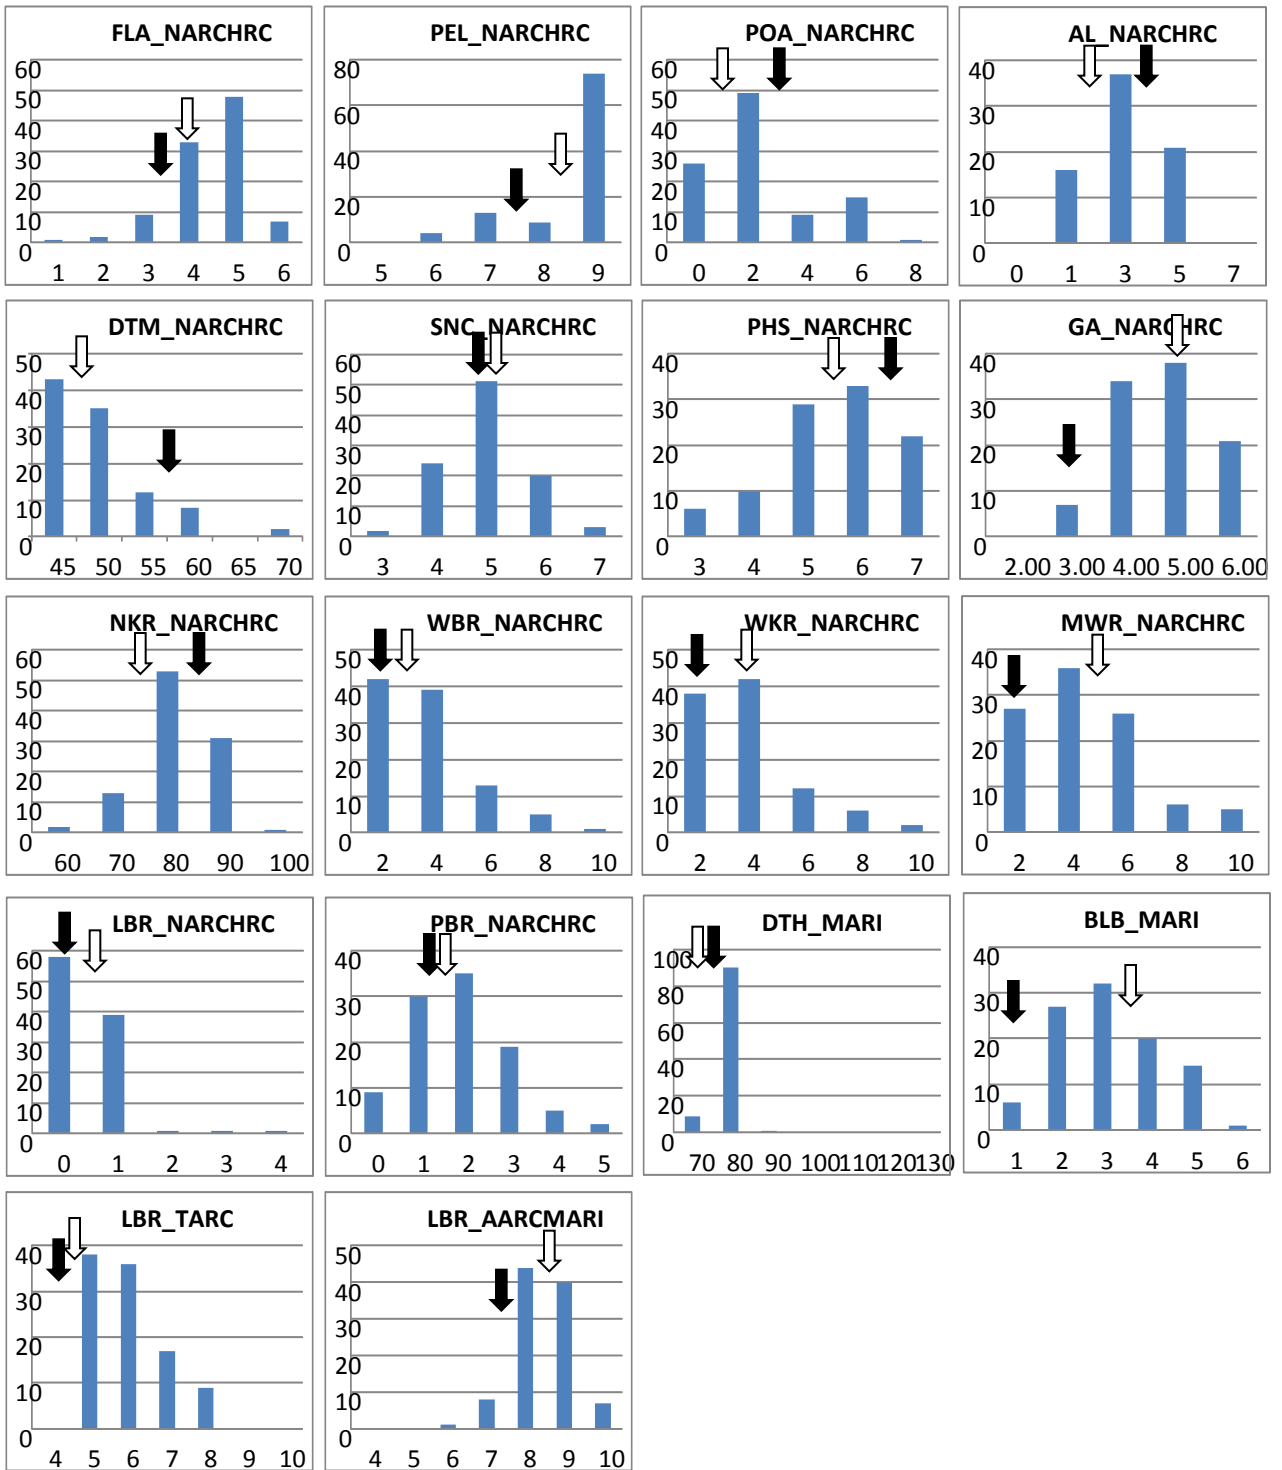

Supplement: jsbbs-62-223-S1.pdf [file jsbbs-62-223-S1.pdf]
