# Supplementary material for: Variation in heading date conceals quantitative trait loci for other traits of importance in breeding selection of rice
Source: PubMed Central journal article supplement — Breed Sci. 2012 Nov 1;62(3):223–34. doi: 10.1270/jsbbs.62.223 (PMC3501939; doi:10.1270/jsbbs.62.223), 2012-11-01
Supplement: jsbbs-62-223-S2.pdf [file jsbbs-62-223-S2.pdf]

**Supplemental Table S1.** Correlation coefficients among 50 agronomic traits evaluated in the fields at KARC, NICS, and NARCHRC in the Nipponbare/Koshihikari backcross inbred lines (BILs)

| KARC                                                             |         |       |        |           |          |          |         |       |        |  |
|------------------------------------------------------------------|---------|-------|--------|-----------|----------|----------|---------|-------|--------|--|
| Trait name                                                       | PHM     | LCM   | LWM    | DTH       | DTM      | CL       | PL      | NOP   | LD     |  |
| Plant height at maximum tiller number stage (PHM)                | ----    | -0.15 | -0.19  | -0.27 *   | -0.26 *  | 0.22 *   | -0.09   | 0.14  | 0.03   |  |
| Leaf color at maximum tiller number stage (LCM)                  | -0.15   | ----  | 0.00   | -0.11     | -0.07    | -0.06    | -0.01   | -0.21 | -0.02  |  |
| Leaf width at maximum tiller number stage (LWM)                  | -0.19   | 0.00  | ----   | 0.28 *    | 0.11     | 0.01     | 0.01    | 0.00  | -0.13  |  |
| Days to heading (DTH)                                            | -0.27 * | -0.11 | 0.28 * | ----      | 0.59 *** | 0.38 *** | 0.28 ** | 0.00  | -0.13  |  |
| Days to maturity (DTM)                                           | -0.26 * | 0.07  | 0.11   | 0.59 ***  | ----     | 0.20     | 0.09    | -0.07 | 0.11   |  |
| Culm length (CL)                                                 | 0.22 *  | -0.06 | 0.01   | 0.38 ***  | 0.20     | ----     | 0.12    | -0.06 | 0.17   |  |
| Panicle length (PL)                                              | -0.09   | -0.01 | 0.01   | 0.28 **   | 0.09     | 0.12     | ----    | 0.12  | -0.10  |  |
| Number of panicles (NOP)                                         | 0.14    | -0.21 | 0.00   | 0.00      | -0.07    | -0.06    | 0.12    | ----  | 0.02   |  |
| Lodging degree (LD)                                              | 0.03    | -0.02 | -0.13  | -0.13     | 0.11     | 0.17     | -0.10   | 0.02  | ----   |  |
| Senescence (SNC)                                                 | 0.05    | 0.01  | 0.12   | 0.09      | 0.13     | 0.04     | -0.04   | -0.12 | 0.07   |  |
| Leaf blast resistance (LBR)                                      | 0.00    | 0.00  | 0.00   | 0.00      | 0.00     | 0.00     | 0.00    | 0.00  | 0.00   |  |
| Panicle blast resistance (PBR)                                   | 0.00    | 0.00  | 0.00   | 0.00      | 0.00     | 0.00     | 0.00    | 0.00  | 0.00   |  |
| Pre-harvest sprouting resistance (PHS)                           | 0.00    | 0.00  | 0.00   | 0.00      | 0.00     | 0.00     | 0.00    | 0.00  | 0.00   |  |
| Flag leaf length (FLL)                                           | 0.06    | -0.05 | 0.07   | 0.43 ***  | 0.21     | 0.44 *** | 0.19    | -0.18 | 0.09   |  |
| Flag leaf: angle of leaf blade (FLA)                             | 0.04    | 0.02  | -0.11  | -0.07     | 0.10     | 0.09     | 0.06    | -0.01 | -0.01  |  |
| Panicle exertion length (PEL)                                    | 0.11    | -0.02 | 0.00   | 0.04      | 0.02     | 0.57 *** | 0.04    | -0.02 | 0.25 * |  |
| Culm diameter (CDI)                                              | 0.01    | -0.18 | 0.14   | 0.60 ***  | 0.32 **  | 0.53 *** | 0.15    | -0.02 | -0.05  |  |
| Culm stiffness (CSF)                                             | 0.02    | -0.18 | 0.08   | -0.44 *** | 0.28 **  | 0.40 *** | 0.13    | 0.14  | -0.18  |  |
| Presence of awns (POA)                                           | 0.00    | 0.00  | 0.00   | 0.00      | 0.00     | 0.00     | 0.00    | 0.00  | 0.00   |  |
| Apiculus color of awn (ACA)                                      | 0.00    | 0.00  | 0.00   | 0.00      | 0.00     | 0.00     | 0.00    | 0.00  | 0.00   |  |
| Lemma and palea color (LPC)                                      | 0.00    | 0.00  | 0.00   | 0.00      | 0.00     | 0.00     | 0.00    | 0.00  | 0.00   |  |
| Glume density per panicle (GDP)                                  | -0.05   | -0.15 | 0.16   | 0.58 ***  | 0.40 *** | 0.39 *** | 0.09    | -0.05 | -0.10  |  |
| Grain appearance (GA)                                            | 0.18    | 0.16  | -0.05  | -0.42 *** | -0.19    | -0.10    | -0.16   | -0.15 | 0.14   |  |
| Head brown rice weight (HBW)                                     | -0.20   | -0.07 | 0.15   | 0.66 ***  | 0.47 *** | 0.41 *** | 0.30 ** | -0.07 | 0.00   |  |
| Weight of aborted rice (ARW)                                     | -0.16   | -0.08 | -0.01  | 0.20      | 0.19     | -0.02    | 0.09    | -0.19 | -0.02  |  |
| Gross brown rice weight (GBW)                                    | -0.21   | -0.07 | 0.15   | 0.66 ***  | 0.47 *** | 0.41 *** | 0.30 ** | -0.08 | 0.00   |  |
| Tiller angle (TA)                                                | 0.03    | -0.17 | 0.00   | 0.18      | 0.15     | 0.11     | 0.06    | -0.04 | 0.06   |  |
| Degree of occurrence of white-belly kernels (DWB)                | -0.20   | -0.06 | 0.19   | 0.13      | 0.09     | -0.03    | 0.15    | 0.09  | -0.20  |  |
| Degree of occurrence of white-center kernels (DWC)               | 0.04    | 0.13  | -0.05  | 0.01      | 0.15     | -0.07    | 0.01    | 0.14  | 0.03   |  |
| Degree of occurrence of milky-white kernels (DMW)                | 0.05    | 0.12  | 0.00   | 0.16      | 0.10     | 0.18     | 0.00    | 0.01  | 0.09   |  |
| Degree of occurrence of white-back and white-based kernels (DWK) | 0.15    | 0.13  | -0.08  | -0.47 *** | -0.29 ** | -0.14    | -0.15   | -0.18 | 0.06   |  |

  

| NICS                                                            |           |           |           |           |          |           |          |      |          |  |
|-----------------------------------------------------------------|-----------|-----------|-----------|-----------|----------|-----------|----------|------|----------|--|
| Trait name                                                      | DTH       | DTM       | CL        | PL        | NOP      | LD        | SNC      | SH   | FLL      |  |
| Days to heading (DTH)                                           | ----      | 0.80 ***  | 0.21      | 0.52 ***  | 0.31 **  | -0.23 *   | 0.29 **  | 0.00 | 0.20     |  |
| Days to maturity (DTM)                                          | 0.80 ***  | ----      | 0.14      | 0.37 ***  | 0.36 *** | -0.10     | 0.46 *** | 0.00 | 0.17     |  |
| Culm length (CL)                                                | 0.21      | 0.14      | ----      | 0.17      | 0.21     | 0.48 ***  | -0.02    | 0.00 | 0.21     |  |
| Panicle length (PL)                                             | 0.52 ***  | 0.37 ***  | 0.17      | ----      | 0.13     | -0.18     | 0.01     | 0.00 | 0.30 **  |  |
| Number of panicles (NOP)                                        | 0.31 **   | 0.36 ***  | 0.21      | 0.13      | ----     | 0.06      | 0.28 *   | 0.00 | 0.15     |  |
| Lodging degree (LD)                                             | -0.23     | -0.10     | 0.48 ***  | -0.18     | 0.06     | ----      | 0.17     | 0.00 | -0.06    |  |
| Senescence (SNC)                                                | 0.29 **   | 0.46 ***  | -0.02     | 0.01      | 0.28 *   | 0.17      | ----     | 0.00 | -0.06    |  |
| Seed shattering (SH)                                            | 0.00      | 0.00      | 0.00      | 0.00      | 0.00     | 0.00      | 0.00     | ---- | 0.00     |  |
| Flag leaf length (FLL)                                          | 0.20      | 0.17      | 0.21      | 0.30 **   | 0.15     | -0.06     | -0.06    | 0.00 | ----     |  |
| Flag leaf: angle of leaf blade (FLA)                            | -0.13     | -0.04     | 0.15      | 0.05      | 0.00     | 0.42 ***  | 0.16     | 0.00 | -0.14    |  |
| Panicle exertion length (PEL)                                   | -0.19     | -0.21     | 0.33 **   | 0.06      | -0.09    | 0.24 *    | -0.21    | 0.00 | 0.06     |  |
| Culm diameter (CDI)                                             | 0.22      | 0.16      | -0.08     | 0.20      | -0.10    | -0.17     | 0.00     | 0.00 | 0.10     |  |
| Culm stiffness (CSF)                                            | -0.56 *** | -0.45 *** | 0.16      | -0.36 *** | 0.05     | 0.45 ***  | -0.12    | 0.00 | -0.05    |  |
| Presence of awns (POA)                                          | 0.55 ***  | 0.54 ***  | -0.07     | 0.12      | 0.16     | -0.25 *   | 0.27 *   | 0.00 | 0.01     |  |
| Awn length (AL)                                                 | 0.61 ***  | 0.61 ***  | 0.01      | 0.15      | 0.19     | -0.17     | 0.31 **  | 0.00 | 0.04     |  |
| Apiculus color of awn (ACA)                                     | 0.00      | 0.00      | 0.00      | 0.00      | 0.00     | 0.00      | 0.00     | 0.00 | 0.00     |  |
| Lemma and palea color (LPC)                                     | 0.00      | 0.00      | 0.00      | 0.00      | 0.00     | 0.00      | 0.00     | 0.00 | 0.00     |  |
| Glume density per panicle (GDP)                                 | 0.10      | 0.22      | 0.02      | -0.01     | -0.08    | -0.01     | 0.26 *   | 0.00 | 0.02     |  |
| 1000-grain weight (TGW)                                         | -0.29 **  | -0.32 **  | 0.12      | 0.13      | -0.03    | 0.11      | -0.20    | 0.00 | 0.18     |  |
| Head brown rice weight (HBW)                                    | 0.00      | 0.17      | 0.31 **   | 0.34 **   | 0.36 *** | 0.26 *    | 0.18     | 0.00 | 0.24 *   |  |
| Aboveground dry weight (ADW)                                    | 0.79 ***  | 0.67 ***  | 0.50 ***  | 0.58 ***  | 0.44 *** | 0.04      | 0.28 *   | 0.00 | 0.26 *   |  |
| Plant appearance at maturity stage (AMS)                        | 0.13      | 0.09      | -0.53 *** | -0.01     | -0.15    | -0.61 *** | -0.13    | 0.00 | -0.14    |  |
| Seedling height at transplanting stage (SHT)                    | -0.49 *** | -0.49 *** | 0.19      | -0.06     | -0.33 ** | 0.28 *    | -0.25 *  | 0.00 | -0.04    |  |
| Leaf color at transplanting stage (LCT)                         | 0.33 **   | 0.31 **   | -0.23 *   | 0.09      | 0.16     | -0.16     | 0.20     | 0.00 | -0.03    |  |
| Plant height after transplanting in paddy field (PHP)           | -0.10     | -0.09     | 0.10      | 0.10      | -0.05    | -0.03     | -0.13    | 0.00 | 0.03     |  |
| Tiller number after transplanting in paddy field (TNP)          | -0.15     | -0.06     | 0.10      | 0.02      | 0.25 *   | 0.09      | -0.08    | 0.00 | 0.02     |  |
| Degree of plant growth after transplanting in paddy field (DPP) | -0.53 *** | -0.50 *** | 0.18      | -0.14     | -0.30 ** | 0.24 *    | -0.25 *  | 0.00 | -0.04    |  |
| Leaf color after transplanting in paddy field (LCP)             | 0.48 ***  | 0.43 ***  | -0.17     | 0.16      | 0.17     | -0.23 *   | 0.20     | 0.00 | 0.00     |  |
| Leaf color at heading date (LCH)                                | 0.08      | 0.10      | -0.30 **  | -0.22     | 0.03     | -0.19     | 0.01     | 0.00 | -0.21    |  |
| Seed fertility (SF)                                             | 0.00      | 0.00      | 0.00      | 0.00      | 0.00     | 0.00      | 0.00     | 0.00 | 0.00     |  |
| Protein content of brown rice (PCB)                             | -0.62 *** | -0.38 *** | -0.39 *** | -0.49 *** | -0.20    | -0.01     | -0.09    | 0.00 | -0.20    |  |
| Milky-white kernel ratio (MWR)                                  | -0.51 *** | -0.28 *   | -0.26 *   | -0.40 *** | 0.05     | 0.08      | 0.03     | 0.00 | -0.30 ** |  |
| White-backed and -based kernel ratio (WKR)                      | -0.50 *** | -0.42 *** | -0.09     | -0.42 *** | -0.04    | 0.23 *    | -0.05    | 0.00 | -0.27 *  |  |
| White-belly kernel ratio (WBR)                                  | -0.31 **  | -0.03     | -0.30 **  | -0.26 *   | 0.03     | 0.03      | 0.29 **  | 0.00 | -0.32 ** |  |
| Normal kernel ratio (NKR)                                       | 0.23 *    | 0.22      | 0.05      | 0.14      | 0.12     | 0.07      | 0.19     | 0.00 | 0.14     |  |

  

| NARCHRC                                           |           |         |         |           |           |          |          |         |           |  |
|---------------------------------------------------|-----------|---------|---------|-----------|-----------|----------|----------|---------|-----------|--|
| Trait name                                        | PHM       | LCM     | LWM     | DTH       | DTM       | CL       | PL       | NOP     | LD        |  |
| Plant height at maximum tiller number stage (PHM) | ----      | -0.25 * | 0.11    | -0.55 *** | -0.48 *** | 0.36 **  | 0.11     | -0.11   | 0.44 ***  |  |
| Leaf color at maximum tiller number stage (LCM)   | -0.25 *   | ----    | -0.06   | 0.12      | 0.08      | -0.22    | -0.10    | 0.35 ** | -0.17     |  |
| Leaf width at maximum tiller number stage (LWM)   | 0.11      | -0.06   | ----    | -0.13     | -0.23     | -0.20    | -0.06    | -0.12   | 0.01      |  |
| Days to heading (DTH)                             | -0.55 *** | 0.12    | -0.13   | ----      | 0.70 ***  | -0.01    | -0.35 ** | 0.06    | -0.51 *** |  |
| Days to maturity (DTM)                            | -0.48 *** | 0.08    | -0.23 * | 0.70 ***  | ----      | -0.03    | -0.24    | 0.02    | -0.48 *** |  |
| Culm length (CL)                                  | 0.36 **   | -0.22   | -0.20 * | -0.01     | -0.03     | ----     | 0.15     | 0.13    | 0.45 ***  |  |
| Panicle length (PL)                               | 0.11      | -0.10   | -0.06   | -0.35 **  | -0.24     | 0.15     | ----     | -0.05   | 0.26 **   |  |
| Number of panicles (NOP)                          | -0.11     | 0.35 ** | -0.12   | 0.06      | 0.02      | 0.13     | -0.05    | ----    | 0.11      |  |
| Lodging degree (LD)                               | 0.44 ***  | -0.17   | 0.01    | -0.51 *** | -0.48 *** | 0.45 *** | 0.26 *   | 0.11    | ----      |  |
| Senescence (SNC)                                  | -0.07     | 0.00    | -0.02   | 0.21      | 0.13      | 0.15     | 0.00     | -0.01   | 0.11      |  |
| Leaf blast resistance (LBR)                       | 0.07      | -0.03   | -0.03   | -0.08     | -0.19     | 0.05     | -0.13    | 0.06    | 0.10      |  |
| Panicle blast resistance (PBR)                    | -0.04     | -0.10   | 0.17    | -0.27 *   | -0.25 *   | -0.17    | 0.19     | -0.14   | -0.07     |  |
| Flag leaf length (FLL)                            | 0.13      | -0.17   | -0.12   | 0.08      | -0.07     | 0.41 *** | 0.19     | -0.14   | 0.13      |  |
| Flag leaf: angle of leaf blade (FLA)              | 0.65 ***  | -0.17   | 0.10    | -0.60 *** | -0.52 *** | 0.25 *   | 0.29 *   | -0.10   | 0.49 ***  |  |
| Panicle exertion length (PEL)                     | 0.43 ***  | 0.01    | 0.01    | -0.50 *** | -0.44 *** | 0.21     | 0.40 *** | 0.01    | 0.33 **   |  |
| Culm diameter (CDI)                               | -0.30 *   | -0.12   | -0.08   | 0.55 ***  | 0.29 *    | 0.12     | -0.09    | -0.16   | -0.41 *** |  |
| Culm stiffness (CSF)                              | 0.39 ***  | -0.02   | 0.00    | -0.59 *** | -0.52 *** | 0.21     | 0.33 **  | 0.19    | 0.66 ***  |  |
| Presence of awns (POA)                            | -0.19     | 0.21    | -0.19   | 0.18      | 0.15      | -0.16    | 0.02     | 0.05    | -0.14     |  |
| Awn length (AL)                                   | -0.24     | 0.06    | -0.01   | 0.24      | 0.11      | -0.25 *  | 0.01     | 0.03    | -0.21     |  |
| Apiculus color of awn (ACA)                       | 0.00      | 0.00    | 0.00    | 0.00      | 0.00      | 0.00     | 0.00     | 0.00    | 0.00      |  |
| Lemma and palea color (LPC)                       | 0.00      | 0.00    | 0.00    | 0.00      | 0.00      | 0.00     | 0.00     | 0.00    | 0.00      |  |
| Glume density per panicle (GDP)                   | 0.21      | -0.07   | 0.13    | -0.30 *   | -0.15     | 0.07     | 0.08     | -0.05   | 0.22      |  |
| Grain appearance (GA)                             | 0.40 ***  | -0.13   | 0.05    | -0.56 *** | -0.45 *** | 0.20     | 0.34 **  | -0.13   | 0.45 ***  |  |
| Milky-white kernel ratio (MWR)                    | 0.52 ***  | -0.10   | 0.11    | -0.65 *** | -0.37 *** | 0.09     | 0.35 **  | 0.02    | 0.38 ***  |  |
| White-backed and white-based kernel ratio (WKR)   | 0.50 ***  | -0.08   | 0.11    | -0.66 *** | -0.45 *** | 0.07     | 0.13     | -0.06   | 0.23      |  |
| White-belly kernel ratio (WBR)                    | 0.21      | -0.08   | 0.05    | -0.41 *** | -0.29 *   | 0.11     | 0.35 **  | 0.04    | 0.35 ***  |  |
| Normal kernel ratio (NKR)                         | -0.45 *** | 0.15    | -0.10   | 0.57 ***  | 0.38 ***  | -0.18    | -0.23    | -0.09   | -0.51 *** |  |
| Pre-harvest sprouting resistance (PHS)            | 0.25 *    | -0.08   | 0.01    | -0.57 *** | -0.12     | -0.02    | 0.27 *   | -0.06   | 0.30 *    |  |

\*, \*\*, \*\*\* indicate significant correlation at  $P < 0.05$ ,  $P < 0.01$ , and  $P < 0.001$ , respectively.

| SNC   | LBR  | PBR  | PHS  | FLL      | FLA   | PEL      | CDI      | CSF      | POA  | ACA  | LPC  | GDD      | GA        |
|-------|------|------|------|----------|-------|----------|----------|----------|------|------|------|----------|-----------|
| 0.05  | 0.00 | 0.00 | 0.00 | 0.06     | 0.04  | 0.11     | 0.01     | 0.02     | 0.00 | 0.00 | 0.00 | -0.05    | 0.18      |
| 0.01  | 0.00 | 0.00 | 0.00 | -0.05    | 0.02  | -0.02    | -0.18    | -0.18    | 0.00 | 0.00 | 0.00 | -0.15    | 0.16      |
| 0.12  | 0.00 | 0.00 | 0.00 | 0.07     | -0.11 | 0.00     | 0.14     | 0.08     | 0.00 | 0.00 | 0.00 | 0.16     | -0.05     |
| 0.09  | 0.00 | 0.00 | 0.00 | 0.43 *** | -0.07 | 0.04     | 0.60 *** | 0.44 *** | 0.00 | 0.00 | 0.00 | 0.58 *** | -0.42 *** |
| 0.13  | 0.00 | 0.00 | 0.00 | 0.21     | 0.10  | 0.02     | 0.32 *** | 0.28 **  | 0.00 | 0.00 | 0.00 | 0.40 *** | -0.19     |
| 0.04  | 0.00 | 0.00 | 0.00 | 0.44 *** | 0.09  | 0.57 *** | 0.53 *** | 0.40 *** | 0.00 | 0.00 | 0.00 | 0.39 *** | -0.10     |
| -0.04 | 0.00 | 0.00 | 0.00 | 0.19     | 0.06  | 0.04     | 0.15     | 0.13     | 0.00 | 0.00 | 0.00 | 0.09     | -0.16     |
| -0.12 | 0.00 | 0.00 | 0.00 | -0.18    | -0.01 | -0.02    | -0.02    | 0.14     | 0.00 | 0.00 | 0.00 | -0.05    | -0.15     |
| 0.07  | 0.00 | 0.00 | 0.00 | 0.09     | -0.01 | 0.25 **  | -0.05    | -0.18    | 0.00 | 0.00 | 0.00 | -0.10    | 0.14      |
| 0.00  | 0.00 | 0.00 | 0.00 | -0.03    | 0.18  | 0.00     | -0.05    | -0.07    | 0.00 | 0.00 | 0.00 | 0.14     | -0.06     |
| 0.00  | 0.00 | 0.00 | 0.00 | 0.00     | 0.00  | 0.00     | 0.00     | 0.00     | 0.00 | 0.00 | 0.00 | 0.00     | 0.00      |
| 0.00  | 0.00 | 0.00 | 0.00 | 0.00     | 0.00  | 0.00     | 0.00     | 0.00     | 0.00 | 0.00 | 0.00 | 0.00     | 0.00      |
| -0.03 | 0.00 | 0.00 | 0.00 | 0.00     | -0.10 | 0.10     | 0.16     | 0.30 **  | 0.18 | 0.00 | 0.00 | 0.33 *** | -0.14     |
| 0.18  | 0.00 | 0.00 | 0.00 | -0.10    | 0.10  | 0.10     | -0.12    | -0.10    | 0.00 | 0.00 | 0.00 | -0.08    | 0.11      |
| 0.00  | 0.00 | 0.00 | 0.00 | 0.16     | 0.10  | 0.10     | 0.16     | 0.16     | 0.00 | 0.00 | 0.00 | 0.14     | 0.29 **   |
| -0.05 | 0.00 | 0.00 | 0.00 | 0.30 **  | -0.12 | 0.16     | 0.67 *** | 0.67 *** | 0.00 | 0.00 | 0.00 | 0.56 *** | -0.16     |
| -0.07 | 0.00 | 0.00 | 0.00 | 0.18     | -0.10 | 0.16     | 0.00     | 0.00     | 0.00 | 0.00 | 0.00 | 0.51 *** | -0.15     |
| 0.00  | 0.00 | 0.00 | 0.00 | 0.00     | 0.00  | 0.00     | 0.00     | 0.00     | 0.00 | 0.00 | 0.00 | 0.00     | 0.00      |
| 0.00  | 0.00 | 0.00 | 0.00 | 0.00     | 0.00  | 0.00     | 0.00     | 0.00     | 0.00 | 0.00 | 0.00 | 0.00     | 0.00      |
| 0.00  | 0.00 | 0.00 | 0.00 | 0.00     | 0.00  | 0.00     | 0.00     | 0.00     | 0.00 | 0.00 | 0.00 | 0.00     | 0.00      |
| 0.14  | 0.00 | 0.00 | 0.00 | 0.33 *** | -0.08 | 0.14     | 0.56 *** | 0.51 *** | 0.00 | 0.00 | 0.00 | 0.00     | -0.17     |
| -0.06 | 0.00 | 0.00 | 0.00 | -0.14    | 0.11  | 0.29 **  | -0.16    | -0.15    | 0.00 | 0.00 | 0.00 | -0.17    | 0.00      |
| 0.12  | 0.00 | 0.00 | 0.00 | 0.31 **  | 0.11  | 0.16     | 0.55 *** | 0.37 *** | 0.00 | 0.00 | 0.00 | 0.50 *** | -0.18     |
| 0.16  | 0.00 | 0.00 | 0.00 | 0.11     | -0.02 | -0.24 *  | 0.11     | 0.11     | 0.00 | 0.00 | 0.00 | 0.22 *   | -0.19     |
| 0.12  | 0.00 | 0.00 | 0.00 | 0.31 **  | 0.11  | 0.14     | 0.55 *** | 0.37 *** | 0.00 | 0.00 | 0.00 | 0.50 *** | -0.19     |
| -0.06 | 0.00 | 0.00 | 0.00 | 0.15     | 0.05  | 0.02     | 0.19     | 0.20     | 0.00 | 0.00 | 0.00 | 0.10     | 0.10      |
| -0.07 | 0.00 | 0.00 | 0.00 | 0.01     | 0.08  | 0.06     | 0.11     | 0.10     | 0.00 | 0.00 | 0.00 | 0.06     | -0.04     |
| 0.04  | 0.00 | 0.00 | 0.00 | -0.18    | 0.02  | -0.09    | 0.04     | -0.02    | 0.00 | 0.00 | 0.00 | -0.06    | 0.38 ***  |
| 0.03  | 0.00 | 0.00 | 0.00 | 0.25 *   | 0.07  | 0.08     | 0.14     | 0.09     | 0.00 | 0.00 | 0.00 | 0.21     | 0.19      |
| -0.14 | 0.00 | 0.00 | 0.00 | -0.12    | 0.05  | 0.23 *   | -0.19    | -0.16    | 0.00 | 0.00 | 0.00 | -0.23 *  | 0.83 ***  |

| FLA      | PEL      | CDI       | CSF       | POA       | AL        | ACA  | LPC  | GDD     | TGW      | HBW      | ADW       | AMS       | SHT       |
|----------|----------|-----------|-----------|-----------|-----------|------|------|---------|----------|----------|-----------|-----------|-----------|
| -0.13    | -0.19    | 0.22      | -0.56 *** | 0.55 ***  | 0.61 ***  | 0.00 | 0.00 | 0.10    | -0.29 ** | 0.00     | 0.79 ***  | 0.13      | -0.49 *** |
| -0.04    | -0.21    | 0.16      | -0.45 *** | 0.54 ***  | 0.61 ***  | 0.00 | 0.00 | 0.22    | -0.32 ** | 0.17     | 0.67 ***  | 0.09      | -0.49 *** |
| 0.15     | 0.33 **  | -0.08     | 0.16      | -0.07     | 0.01      | 0.00 | 0.00 | 0.02    | 0.12     | 0.31 **  | 0.50 ***  | -0.53 *** | 0.19      |
| 0.05     | 0.06     | 0.20      | -0.36 *** | 0.12      | 0.15      | 0.00 | 0.00 | -0.01   | 0.13     | 0.34 **  | 0.58 ***  | -0.01     | -0.06     |
| 0.00     | -0.09    | -0.10     | 0.05      | 0.16      | 0.19      | 0.00 | 0.00 | -0.08   | -0.03    | 0.36 *** | 0.44 ***  | -0.15     | -0.33 **  |
| 0.42 *** | 0.24 *   | -0.17     | 0.45 ***  | -0.25 *   | -0.17     | 0.00 | 0.00 | -0.01   | 0.11     | 0.26 *   | 0.04      | -0.61 *** | 0.28 *    |
| 0.16     | -0.21    | 0.00      | -0.12     | 0.27 *    | 0.31 **   | 0.00 | 0.00 | 0.26 *  | -0.20    | 0.18     | 0.28 *    | -0.13     | -0.25 *   |
| 0.00     | 0.00     | 0.00      | 0.00      | 0.00      | 0.00      | 0.00 | 0.00 | 0.00    | 0.00     | 0.00     | 0.00      | 0.00      | 0.00      |
| -0.14    | 0.06     | 0.10      | -0.05     | 0.01      | 0.04      | 0.00 | 0.00 | 0.02    | 0.18     | 0.24 *   | 0.26 *    | -0.14     | -0.04     |
| 0.17     | 0.17     | -0.05     | 0.20      | 0.12      | 0.08      | 0.00 | 0.00 | -0.15   | 0.12     | 0.34 **  | 0.09      | -0.29 **  | 0.09      |
| 0.01     | -0.05    | -0.28 *   | -0.28 *   | 0.12      | 0.16      | 0.00 | 0.00 | 0.02    | 0.04     | 0.06     | 0.24 *    | 0.09      | -0.05     |
| 0.20     | 0.27 *   | -0.28 *   | -0.32 **  | -0.32 **  | -0.36 *** | 0.00 | 0.00 | -0.08   | 0.21     | 0.03     | -0.41 *** | -0.44 *** | 0.29 **   |
| 0.12     | -0.11    | 0.12      | -0.32 **  | 0.88 ***  | 0.88 ***  | 0.00 | 0.00 | -0.11   | -0.14    | -0.15    | 0.30 **   | 0.18      | -0.50 *** |
| 0.08     | -0.07    | 0.16      | -0.36 *** | 0.88 ***  | 0.00      | 0.00 | 0.00 | -0.03   | -0.16    | -0.15    | 0.33 **   | 0.09      | -0.51 *** |
| 0.00     | 0.00     | 0.00      | 0.00      | 0.00      | 0.00      | 0.00 | 0.00 | 0.00    | 0.00     | 0.00     | 0.00      | 0.00      | 0.00      |
| 0.00     | 0.00     | 0.00      | 0.00      | 0.00      | 0.00      | 0.00 | 0.00 | 0.00    | 0.00     | 0.00     | 0.00      | 0.00      | 0.00      |
| -0.15    | -0.07    | 0.02      | -0.08     | -0.11     | -0.03     | 0.00 | 0.00 | -0.27 * | 0.09     | 0.10     | 0.16      | 0.16      | 0.00      |
| 0.12     | 0.15     | 0.04      | 0.21      | -0.14     | -0.16     | 0.00 | 0.00 | -0.27 * | 0.29 **  | -0.10    | -0.22     | 0.14      | 0.00      |
| 0.34 **  | 0.12     | 0.06      | 0.03      | -0.15     | -0.15     | 0.00 | 0.00 | 0.29 ** | 0.29 **  | 0.50 *** | -0.23 *   | 0.09      | 0.00      |
| 0.09     | -0.01    | 0.24 *    | -0.41 *** | 0.30 **   | 0.33 **   | 0.00 | 0.00 | 0.10    | -0.10    | 0.50 *** | -0.13     | -0.13     | -0.25 *   |
| -0.29 ** | -0.33 ** | 0.09      | -0.44 *** | 0.18      | 0.09      | 0.00 | 0.00 | 0.16    | -0.22    | -0.23 *  | -0.13     | -0.17     | -0.17     |
| 0.09     | 0.10     | -0.05     | 0.29 **   | -0.50 *** | -0.51 *** | 0.00 | 0.00 | 0.00    | 0.14     | 0.09     | -0.25 *   | -0.17     | 0.00      |
| 0.06     | -0.06    | 0.09      | -0.16     | 0.47 ***  | 0.44 ***  | 0.00 | 0.00 | -0.18   | -0.01    | -0.06    | 0.14      | 0.09      | -0.80 *** |
| -0.03    | 0.17     | 0.01      | -0.01     | -0.14     | -0.15     | 0.00 | 0.00 | -0.05   | 0.05     | 0.07     | -0.03     | -0.11     | 0.31 **   |
| 0.22     | 0.11     | -0.11     | 0.06      | -0.14     | -0.16     | 0.00 | 0.00 | -0.26 * | 0.12     | 0.29 **  | 0.09      | -0.15     | 0.15      |
| 0.20     | 0.30 **  | -0.06     | 0.27 *    | -0.47 *** | -0.46 *** | 0.00 | 0.00 | -0.04   | 0.10     | 0.12     | -0.24 *   | -0.17     | 0.77 ***  |
| -0.13    | -0.17    | 0.09      | -0.30 **  | 0.50 ***  | 0.49 ***  | 0.00 | 0.00 | 0.01    | -0.03    | -0.23 *  | 0.21      | 0.08      | -0.65 *** |
| -0.05    | -0.11    | 0.02      | -0.03     | 0.39 ***  | 0.36 ***  | 0.00 | 0.00 | -0.17   | -0.12    | -0.29 ** | -0.18     | 0.15      | -0.42 *** |
| 0.00     | 0.00     | 0.00      | 0.00      | 0.00      | 0.00      | 0.00 | 0.00 | 0.00    | 0.00     | 0.00     | 0.00      | 0.00      | 0.00      |
| 0.04     | 0.06     | -0.13     | 0.29 **   | -0.10     | -0.16     | 0.00 | 0.00 | -0.17   | 0.00     | -0.18    | -0.61 *** | 0.11      | 0.06      |
| 0.02     | -0.05    | -0.38 *** | 0.34 **   | -0.19     | -0.25 *   | 0.00 | 0.00 | 0.13    | 0.11     | 0.05     | -0.44 *** | 0.09      | 0.05      |
| 0.10     | 0.04     | -0.10     | 0.37 ***  | -0.30 **  | -0.29 **  | 0.00 | 0.00 | -0.01   | 0.09     | -0.08    | -0.42 *** | -0.10     | 0.20      |
| 0.27 *   | -0.06    | -0.14     | 0.07      | 0.01      | -0.06     | 0.00 | 0.00 | 0.09    | 0.01     | 0.27 *   | -0.18     | 0.10      | -0.14     |
| 0.08     | -0.02    | 0.00      | -0.17     | 0.15      | 0.13      | 0.00 | 0.00 | -0.02   | -0.23 *  | -0.04    | 0.19      | -0.06     | -0.04     |

| SNC   | LBR     | PBR     | SH   | FLL      | FLA       | PEL       | CDI       | CSF       | POA      | AL      | ACA  | LPC  | GDD     |
|-------|---------|---------|------|----------|-----------|-----------|-----------|-----------|----------|---------|------|------|---------|
| -0.07 | 0.07    | -0.04   | 0.00 | 0.13     | 0.65 ***  | 0.43 ***  | -0.30 *   | 0.39 ***  | -0.19    | -0.24   | 0.00 | 0.00 | 0.21    |
| 0.00  | -0.03   | -0.10   | 0.00 | -0.17    | -0.17     | 0.01      | -0.12     | -0.02     | 0.21     | 0.06    | 0.00 | 0.00 | -0.07   |
| -0.02 | -0.03   | 0.17    | 0.00 | -0.12    | 0.10      | 0.01      | -0.08     | 0.00      | -0.19    | -0.01   | 0.00 | 0.00 | 0.13    |
| 0.21  | -0.08   | -0.27 * | 0.00 | 0.08     | -0.60 *** | -0.50 *** | 0.55 ***  | -0.59 *** | 0.18     | 0.24    | 0.00 | 0.00 | -0.30 * |
| 0.13  | -0.19   | -0.25 * | 0.00 | -0.07    | -0.52 *** | -0.44 *** | 0.29 *    | -0.52 *** | 0.15     | 0.11    | 0.00 | 0.00 | -0.15   |
| 0.15  | 0.05    | -0.17   | 0.00 | 0.41 *** | 0.25 *    | 0.21      | 0.12      | -0.12     | -0.16    | -0.25 * | 0.00 | 0.00 | 0.07    |
| 0.00  | -0.13   | 0.19    | 0.00 | 0.19     | 0.29 *    | 0.40 ***  | -0.09     | 0.33 **   | 0.02     | 0.01    | 0.00 | 0.00 | 0.08    |
| -0.01 | 0.06    | -0.14   | 0.00 | -0.14    | -0.10     | 0.01      | -0.16     | 0.19      | 0.05     | 0.03    | 0.00 | 0.00 | -0.05   |
| 0.11  | 0.10    | -0.07   | 0.00 | 0.13     | 0.49 ***  | 0.33 **   | -0.41 *** | 0.66 ***  | -0.14    | -0.21   | 0.00 | 0.00 | 0.22    |
| 0.10  | 0.10    | 0.00    | 0.00 | 0.08     | -0.01     | -0.02     | 0.04      | 0.01      | -0.04    | -0.17   | 0.00 | 0.00 | -0.20   |
| 0.00  | 0.12    | 0.12    | 0.00 | -0.13    | 0.13      | 0.04      | -0.02     | 0.12      | -0.27 *  | -0.30 * | 0.00 | 0.00 | -0.16   |
| 0.08  | -0.13   | -0.09   | 0.00 | -0.09    | 0.14      | 0.01      | -0.03     | -0.11     | 0.05     | 0.01    | 0.00 | 0.00 | 0.11    |
| -0.01 | 0.13    | 0.14    | 0.00 | 0.17     | 0.17      | 0.30 *    | 0.27 *    | -0.09     | 0.02     | -0.06   | 0.00 | 0.00 | 0.01    |
| -0.02 | 0.04    | 0.01    | 0.00 | 0.30 *   | 0.54 ***  | 0.54 ***  | -0.18     | 0.42 ***  | -0.15    | -0.17   | 0.00 | 0.00 | 0.13    |
| 0.04  | -0.02   | -0.03   | 0.00 | 0.27 *   | -0.18     | -0.14     | -0.14     | 0.35 **   | -0.09    | -0.10   | 0.00 | 0.00 | 0.05    |
| 0.01  | 0.12    | -0.11   | 0.00 | -0.09    | 0.42 ***  | 0.35 **   | -0.57 *** | -0.14     | -0.14    | -0.17   | 0.00 | 0.00 | 0.09    |
| -0.04 | -0.27 * | 0.05    | 0.00 | 0.02     | -0.15     | -0.09     | 0.12      | -0.14     | 0.75 *** | 0.00    | 0.00 | 0.00 | 0.06    |
| -0.17 | -0.30 * | 0.01    | 0.00 | -0.06    | -0.17     | -0.10     | 0.19      | -0.17     | 0.75 *** | 0.00    | 0.00 | 0.00 | -0.05   |
| 0.00  | 0.00    | 0.00    | 0.00 | 0.00     | 0.00      | 0.00      | 0.00      | 0.00      | 0.00     | 0.00    | 0.00 | 0.00 | 0.00    |
| 0.00  | 0.00    | 0.00    | 0.00 | 0.00     | 0.00      | 0.00      | 0.00      | 0.00      | 0.00     | 0.00    | 0.00 | 0.00 | 0.00    |
| -0.20 | -0.16   | 0.11    | 0.00 | 0.11     | 0.13      | 0.05      | -0.14     | 0.09      | 0.06     | -0.05   | 0.00 | 0.00 | 0.00    |
| 0.00  | 0.03    | 0.14    | 0.00 | 0.12     | 0.37 ***  | 0.34 **   | -0.39 *** | 0.42 ***  | -0.15    | -0.21   | 0.00 | 0.00 | 0.21    |
| -0.06 | -0.04   | 0.16    | 0.00 | -0.02    | 0.49 ***  | 0.37 ***  | -0.44 *** | 0.45 ***  | -0.20    | -0.21   | 0.00 | 0.00 | 0.19    |
| -0.11 | 0.01    | 0.19    | 0.00 | 0.02     | 0.38 ***  | 0.37 ***  | -0.40 *** | 0.34 **   | -0.18    | -0.17   | 0.00 | 0.00 | 0.09    |
| -0.05 | 0.08    | 0.17    | 0.00 | 0.06     | 0.36 ***  | 0.41 ***  | -0.28 *   | 0.31 **   | -0.02    | -0.05   | 0.00 | 0.00 | 0.21    |
| 0.02  | -0.05   | -0.01   | 0.00 | 0.04     | -0.39 *** | -0.33 **  | 0.50 ***  | -0.59 *** | 0.11     | 0.13    | 0.00 | 0.00 |         |

| HBW      | ARW     | GBW      | TA     | DWB   | DWC      | DMW    | DWK       |
|----------|---------|----------|--------|-------|----------|--------|-----------|
| -0.20    | -0.16   | -0.21 *  | 0.03   | -0.20 | 0.04     | 0.05   | 0.15      |
| -0.07    | -0.08   | -0.07    | -0.17  | -0.06 | 0.13     | 0.12   | 0.13      |
| 0.15     | -0.01   | 0.15     | 0.00   | 0.19  | -0.05    | 0.00   | -0.08     |
| 0.66 *** | 0.20    | 0.66 *** | 0.18   | 0.13  | 0.01     | 0.16   | -0.47 *** |
| 0.47 *** | 0.19    | 0.47 *** | 0.15   | 0.09  | 0.15     | 0.10   | -0.29 **  |
| 0.41 *** | -0.02   | 0.41 *** | 0.11   | -0.03 | -0.07    | 0.18   | -0.14     |
| 0.30 **  | 0.09    | 0.30 **  | 0.06   | 0.15  | 0.01     | 0.00   | -0.15     |
| -0.07    | -0.19   | -0.08    | -0.04  | 0.06  | 0.14     | 0.01   | -0.18     |
| 0.00     | -0.02   | 0.00     | 0.06   | -0.20 | 0.03     | 0.09   | 0.06      |
| 0.12     | 0.16    | 0.12     | -0.06  | -0.07 | 0.04     | 0.03   | -0.14     |
| 0.00     | 0.00    | 0.00     | 0.00   | 0.00  | 0.00     | 0.00   | 0.00      |
| 0.00     | 0.00    | 0.00     | 0.00   | 0.00  | 0.00     | 0.00   | 0.00      |
| 0.00     | 0.00    | 0.00     | 0.00   | 0.00  | 0.00     | 0.00   | 0.00      |
| 0.31 **  | 0.11    | 0.31 **  | 0.15   | 0.01  | -0.18    | 0.25 * | -0.12     |
| 0.11     | -0.02   | 0.11     | 0.05   | 0.08  | 0.02     | 0.07   | 0.05      |
| 0.16     | -0.24 * | 0.14     | 0.02   | 0.06  | -0.09    | 0.08   | 0.23 *    |
| 0.55 *** | 0.11    | 0.55 *** | 0.19   | 0.11  | 0.04     | 0.14   | -0.19     |
| 0.37 *** | 0.11    | 0.37 *** | 0.20   | 0.10  | -0.02    | 0.09   | -0.16     |
| 0.00     | 0.00    | 0.00     | 0.00   | 0.00  | 0.00     | 0.00   | 0.00      |
| 0.00     | 0.00    | 0.00     | 0.00   | 0.00  | 0.00     | 0.00   | 0.00      |
| 0.00     | 0.00    | 0.00     | 0.00   | 0.00  | 0.00     | 0.00   | 0.00      |
| 0.50 *** | 0.22 *  | 0.50 *** | 0.10   | 0.06  | -0.06    | 0.21   | -0.23 *   |
| -0.18    | -0.19   | -0.19    | 0.10   | -0.04 | 0.38 *** | 0.19   | 0.83 ***  |
| ----     | 0.25 *  | 1.00 *** | 0.23 * | 0.08  | 0.06     | 0.20   | -0.29     |
| 0.25 *   | ----    | 0.29 **  | 0.11   | -0.09 | -0.08    | 0.03   | -0.23 *   |
| 1.00 *** | 0.29 ** | ----     | 0.23 * | 0.08  | 0.05     | 0.20   | -0.30     |
| 0.23 *   | 0.11    | 0.23 *   | ----   | 0.11  | 0.00     | 0.08   | 0.03      |
| 0.08     | -0.09   | 0.08     | 0.11   | ----  | 0.05     | -0.05  | -0.19     |
| 0.06     | -0.08   | 0.05     | 0.00   | 0.05  | ----     | 0.01   | 0.00      |
| 0.20     | 0.03    | 0.20     | 0.08   | -0.05 | 0.01     | ----   | 0.06      |
| -0.29    | -0.23 * | -0.30    | 0.03   | -0.19 | 0.00     | 0.06   | ----      |

| LCT       | PHP     | TNP      | DPP       | LCP       | LCH       | SF   | PCB       | MWR       | WKR       | WBR      | NKR       |
|-----------|---------|----------|-----------|-----------|-----------|------|-----------|-----------|-----------|----------|-----------|
| 0.33 **   | -0.10   | -0.15    | -0.53 *** | 0.48 ***  | 0.08      | 0.00 | -0.62 *** | -0.51 *** | -0.50 *** | -0.31 ** | 0.23 *    |
| 0.31 **   | -0.09   | -0.06    | -0.50 *** | 0.43 ***  | 0.10      | 0.00 | -0.38 *** | -0.28 *   | -0.42 *** | -0.03    | 0.22 *    |
| -0.23 *   | 0.10    | 0.10     | 0.18      | -0.17     | -0.30 **  | 0.00 | -0.39 *** | -0.26 *   | -0.09     | -0.30 ** | 0.05      |
| 0.09      | 0.10    | 0.02     | -0.14     | 0.16      | -0.22     | 0.00 | -0.49 *** | -0.40 *** | -0.42 *** | -0.26 *  | 0.14      |
| 0.16      | -0.05   | 0.25 *   | -0.30 **  | 0.17      | 0.03      | 0.00 | -0.20     | 0.05      | -0.04     | 0.03     | 0.12      |
| -0.16     | -0.03   | 0.09     | 0.24 *    | -0.23 *   | -0.19     | 0.00 | -0.01     | 0.08      | 0.23 *    | 0.03     | 0.07      |
| 0.20      | -0.13   | -0.08    | -0.25 *   | 0.20      | 0.01      | 0.00 | -0.09     | 0.03      | -0.05     | 0.29 *   | 0.19      |
| 0.00      | 0.00    | 0.00     | 0.00      | 0.00      | 0.00      | 0.00 | 0.00      | 0.00      | 0.00      | 0.00     | 0.00      |
| -0.03     | 0.03    | 0.02     | -0.04     | 0.00      | -0.21     | 0.00 | -0.20     | -0.30 **  | -0.27 *   | -0.32 ** | 0.14      |
| 0.06      | -0.03   | 0.22     | 0.20      | -0.13     | -0.05     | 0.00 | 0.04      | 0.02      | 0.10      | 0.27 *   | 0.08      |
| -0.06     | 0.17    | 0.11     | 0.30 **   | -0.17     | -0.11     | 0.00 | 0.06      | -0.05     | 0.04      | -0.06    | -0.02     |
| 0.09      | 0.01    | -0.11    | -0.06     | 0.09      | 0.02      | 0.00 | -0.13     | -0.38 *** | -0.10     | -0.14    | 0.00      |
| -0.16     | -0.01   | 0.06     | 0.27 *    | -0.30 **  | -0.03     | 0.00 | 0.29 **   | 0.34 **   | 0.37 ***  | 0.07     | -0.17     |
| 0.47 ***  | -0.14   | -0.14    | -0.47 *** | 0.50 ***  | 0.39 ***  | 0.00 | -0.10     | -0.19     | -0.30 **  | 0.01     | 0.15      |
| 0.44 ***  | -0.15   | -0.16    | -0.46 *** | 0.49 ***  | 0.36 ***  | 0.00 | -0.16     | -0.25 *   | -0.29 *   | -0.06    | 0.13      |
| 0.00      | 0.00    | 0.00     | 0.00      | 0.00      | 0.00      | 0.00 | 0.00      | 0.00      | 0.00      | 0.00     | 0.00      |
| 0.00      | 0.00    | 0.00     | 0.00      | 0.00      | 0.00      | 0.00 | 0.00      | 0.00      | 0.00      | 0.00     | 0.00      |
| -0.18     | -0.05   | -0.26 *  | -0.04     | 0.01      | -0.17     | 0.00 | -0.17     | 0.13      | -0.01     | 0.09     | -0.02     |
| -0.01     | 0.05    | 0.12     | 0.10      | -0.03     | -0.12     | 0.00 | 0.00      | 0.11      | 0.09      | 0.01     | -0.23 *   |
| -0.06     | 0.07    | 0.29 **  | 0.12      | -0.23 *   | -0.29 **  | 0.00 | -0.18     | 0.05      | -0.08     | 0.27 *   | -0.04     |
| 0.14      | -0.03   | 0.09     | -0.24 *   | 0.21      | -0.18     | 0.00 | -0.61 *** | -0.44 *** | -0.42 *** | -0.18    | 0.19      |
| 0.09      | -0.11   | -0.15    | -0.17     | 0.08      | 0.15      | 0.00 | 0.11      | 0.09      | -0.10     | 0.10     | -0.06     |
| -0.80 *** | 0.31 ** | 0.15     | 0.77 ***  | -0.65 *** | -0.42 *** | 0.00 | 0.06      | 0.05      | 0.20      | -0.14    | -0.04     |
| ----      | -0.27 * | -0.11    | -0.67 *** | 0.59 ***  | 0.49 ***  | 0.00 | -0.01     | -0.06     | -0.19     | 0.14     | 0.07      |
| -0.27 *   | ----    | 0.08     | 0.28 *    | -0.21     | -0.19     | 0.00 | -0.06     | 0.06      | 0.17      | -0.08    | 0.03      |
| -0.11     | 0.08    | ----     | 0.39 ***  | -0.32 **  | -0.06     | 0.00 | 0.03      | 0.05      | -0.18     | 0.11     | 0.05      |
| -0.67 *** | 0.28 *  | 0.39 *** | ----      | -0.70 *** | -0.34 **  | 0.00 | 0.18      | 0.03      | 0.17      | -0.03    | -0.03     |
| 0.59 ***  | -0.21   | -0.32 ** | -0.70 *** | ----      | 0.39 ***  | 0.00 | -0.22 *   | -0.16     | -0.21     | -0.07    | 0.12      |
| 0.49 ***  | -0.19   | -0.06    | -0.34 **  | 0.39 ***  | ----      | 0.00 | 0.31 **   | 0.03      | -0.25 *   | 0.22 *   | -0.03     |
| 0.00      | 0.00    | 0.00     | 0.00      | 0.00      | 0.00      | ---- | 0.00      | 0.00      | 0.00      | 0.00     | 0.00      |
| -0.01     | -0.06   | 0.03     | 0.18      | -0.22     | 0.31 **   | 0.00 | ----      | 0.32 **   | 0.17      | 0.34 **  | 0.00      |
| -0.06     | 0.06    | 0.05     | 0.03      | -0.16     | 0.03      | 0.00 | 0.32 **   | ----      | 0.52 ***  | 0.62 *** | -0.41 *** |
| -0.19     | 0.17    | -0.18    | 0.17      | -0.21     | -0.25 *   | 0.00 | 0.17      | 0.52 ***  | ----      | 0.23 *   | -0.37 *** |
| 0.14      | -0.08   | 0.11     | -0.03     | -0.07     | 0.22      | 0.00 | 0.34 **   | 0.62 ***  | 0.23 *    | ----     | -0.26 **  |
| 0.07      | 0.03    | 0.05     | -0.03     | 0.12      | -0.03     | 0.00 | 0.00      | -0.41     | -0.37 *** | -0.26 *  | ----      |

| GA        | MWR       | WKR       | WBR       | NKR       | PHS       |
|-----------|-----------|-----------|-----------|-----------|-----------|
| 0.40 ***  | 0.52 ***  | 0.50 ***  | 0.21      | -0.45 *** | 0.25 *    |
| -0.13     | -0.10     | -0.08     | -0.08     | 0.15      | -0.08     |
| 0.05      | 0.11      | 0.11      | 0.05      | -0.10     | 0.01      |
| -0.56 *** | -0.65 *** | -0.66 *** | -0.41 *** | 0.57 ***  | -0.57 *** |
| -0.45 *** | -0.37 *** | -0.45 *** | -0.29 *   | 0.38 ***  | -0.12     |
| 0.20      | 0.09      | 0.07      | 0.11      | -0.18     | -0.02     |
| 0.34 **   | 0.35 **   | 0.13      | 0.35 **   | -0.23     | 0.27 *    |
| -0.13     | 0.02      | -0.06     | 0.04      | -0.09     | -0.06     |
| 0.45 ***  | 0.38 ***  | 0.23      | 0.35 **   | -0.51 *** | 0.30 *    |
| 0.00      | -0.06     | -0.11     | -0.05     | 0.02      | 0.02      |
| 0.03      | -0.04     | 0.01      | 0.08      | -0.05     | -0.04     |
| 0.14      | 0.16      | 0.19      | 0.17      | -0.01     | 0.10      |
| 0.12      | -0.02     | 0.02      | 0.06      | 0.04      | -0.03     |
| 0.37 ***  | 0.49 ***  | 0.38 ***  | 0.36 **   | -0.39 *** | 0.32 **   |
| 0.34 **   | 0.37 ***  | 0.37 ***  | 0.41 ***  | -0.33 **  | 0.34 **   |
| -0.39 *** | -0.44 *** | -0.40 *** | -0.28 *   | 0.50 ***  | -0.35 **  |
| 0.42 ***  | 0.45 ***  | 0.34 **   | 0.31 **   | -0.59 *** | 0.30 *    |
| -0.15     | -0.20     | -0.18     | -0.02     | 0.11      | -0.01     |
| -0.21     | -0.21     | -0.17     | -0.05     | 0.13      | -0.07     |
| 0.00      | 0.00      | 0.00      | 0.00      | 0.00      | 0.00      |
| 0.00      | 0.00      | 0.00      | 0.00      | 0.00      | 0.00      |
| 0.21      | 0.19      | 0.09      | 0.21      | -0.21     | 0.18      |
| ----      | 0.71 ***  | 0.58 ***  | 0.69 ***  | -0.73 *** | 0.22      |
| 0.71 ***  | ----      | 0.76 ***  | 0.53 ***  | -0.77 *** | 0.44 ***  |
| 0.58 ***  | 0.76 ***  | ----      | 0.31 **   | -0.66 *** | 0.40 ***  |
| 0.69 ***  | 0.53 ***  | 0.31 **   | ----      | -0.55 *** | 0.28 *    |
| -0.73 *** | -0.77 *** | -0.66 *** | -0.55 *** | ----      | -0.36 **  |
| 0.22      | 0.44 ***  | 0.40 ***  | 0.28 *    | -0.36 **  | ----      |
