# Supplementary material for: Variation in heading date conceals quantitative trait loci for other traits of importance in breeding selection of rice
Source: PubMed Central journal article supplement — Breed Sci. 2012 Nov 1;62(3):223–34. doi: 10.1270/jsbbs.62.223 (PMC3501939; doi:10.1270/jsbbs.62.223), 2012-11-01
Supplement: jsbbs-62-223-S3.pdf [file jsbbs-62-223-S3.pdf]

**Supplemental Table S2.** Summary of 122 QTLs for 38 agronomic traits detected in the Nipponbare/Koshihikari BILs

| Trait                                                           | Institute | Marker Interval                       | Chr. | LOD  | PVE  | AE   | GxE       | Nearby QTL     |
|-----------------------------------------------------------------|-----------|---------------------------------------|------|------|------|------|-----------|----------------|
| Seedling height at transplanting stage (SHT)                    | NICS      | NIAS_Os_aa03002687-RM2187             | 3    | 13.2 | 35.7 | -0.6 |           | <i>Hd16</i>    |
|                                                                 |           | NIAS_Os_aa12005228-NIAS_Os_aa12005318 | 12   | 5.4  | 13.6 | 0.3  |           |                |
| Leaf color at transplanting stage (LCT)                         | NICS      | NIAS_Os_aa03002687-RM2187             | 3    | 7.9  | 22.6 | 0.5  |           | <i>Hd16</i>    |
| Degree of plant growth after transplanting in paddy field (DPP) | NICS      | NIAS_Os_aa03002687-RM2187             | 3    | 10.2 | 33.6 | -0.4 |           | <i>Hd16</i>    |
| Leaf color after transplanting in paddy field (LCP)             | NICS      | NIAS_Os_aa03002687-RM2187             | 3    | 6.6  | 17.3 | 0.3  |           | <i>Hd16</i>    |
| Plant height at maximum tiller number stage (PHM)               | NARCHRC   | NIAS_Os_aa03002687-RM2187             | 3    | 13.7 | 36.7 | -0.5 | 0.002 **  | <i>Hd16</i>    |
|                                                                 |           | O007O20-P525F142                      | 6    | 15.5 | 44.3 | 0.5  | 0.065     | <i>Hd17</i>    |
| Leaf width at maximum tiller number stage (LWM)                 | KARC      | NIAS_Os_aa03002610-RM1038             | 3    | 4.5  | 13.8 | 0.1  | 0.009 **  | <i>Hd16</i>    |
| Days to heading (DTH)                                           | MARI      | OJ24J17-NIAS_Os_aa03002564            | 3    | 23.0 | 50.4 | 2.3  | 0.000 *** | <i>Hd16</i>    |
|                                                                 |           | O007O20-P525F142                      | 6    | 3.8  | 6.3  | -0.8 | 0.007 **  | <i>Hd17</i>    |
|                                                                 | KARC      | NIAS_Os_aa01046-05-NIAS_Os_aa08000907 | 8    | 6.5  | 9.5  | 0.9  | 0.592     |                |
|                                                                 |           | OJ24J17-NIAS_Os_aa03002564            | 3    | 36.2 | 65.5 | 4.8  | 0.000 *** | <i>Hd16</i>    |
|                                                                 | NICS      | O007O20-P525F142                      | 6    | 7.4  | 9.0  | -1.7 | 0.007 **  | <i>Hd17</i>    |
|                                                                 |           | OJ24J17-NIAS_Os_aa03002564            | 3    | 62.9 | 73.8 | 7.5  | 0.000 *** | <i>Hd16</i>    |
|                                                                 | NARCHRC   | O007O20-P525F142                      | 6    | 29.0 | 9.7  | -2.7 | 0.007 **  | <i>Hd17</i>    |
|                                                                 |           | OJ24J17-NIAS_Os_aa03002564            | 3    | 54.9 | 69.7 | 7.8  | 0.000 *** | <i>Hd16</i>    |
| Culm length (CL)                                                | KARC      | O007O20-P525F142                      | 6    | 17.5 | 7.6  | -2.5 | 0.007 **  | <i>Hd17</i>    |
|                                                                 |           | NIAS_Os_aa01000431-NIAS_Os_aa01000638 | 1    | 3.1  | 12.2 | -1.9 | 0.540     | <i>qCL1</i>    |
|                                                                 | NICS      | NIAS_Os_aa01000431-NIAS_Os_aa01000638 | 1    | 6.0  | 18.5 | -2.3 | 0.540     | <i>qCL1</i>    |
|                                                                 |           | NIAS_Os_aa03000545-RM1284             | 3    | 4.7  | 12.7 | -1.9 | 0.225     | <i>qCL3-1</i>  |
|                                                                 | NARCHRC   | O007O20-P525F142                      | 6    | 3.0  | 8.4  | -1.7 | 0.621     | <i>Hd17</i>    |
|                                                                 |           | NIAS_Os_aa12001500-NIAS_Os_aa12001533 | 12   | 3.2  | 8.4  | -1.4 | 0.853     |                |
|                                                                 | NARCHRC   | RM10078-NIAS_Os_aa01000431            | 1    | 3.3  | 9.5  | -1.9 | 0.540     | <i>qCL1</i>    |
|                                                                 |           | RM5178-RM3434                         | 3    | 4.2  | 14.2 | -2.2 | 0.225     | <i>qCL3-1</i>  |
| Culm diameter (CDI)                                             | KARC      | OJ94O03-4-OJ24J17                     | 3    | 8.8  | 30.8 | 0.5  | 0.000 *** | <i>Hd16</i>    |
|                                                                 |           | O007O20-P525F142                      | 6    | 6.5  | 41.2 | -0.6 | 0.134     | <i>Hd17</i>    |
|                                                                 | NARCHRC   | RM6740-NIAS_Os_aa01006287             | 1    | 3.2  | 8.7  | -0.2 | 0.064     |                |
|                                                                 |           | NIAS_Os_aa02004129-RM5179             | 2    | 3.0  | 7.8  | -0.2 | 0.134     |                |
|                                                                 | KARC      | OJ24J17-NIAS_Os_aa03002564            | 3    | 5.0  | 13.9 | 0.3  | 0.000 *** | <i>Hd16</i>    |
|                                                                 |           | OJ24J17-NIAS_Os_aa03002564            | 3    | 6.5  | 21.8 | -0.5 | 0.000 *** | <i>Hd16</i>    |
| Culm stiffness (CSF)                                            | NICS      | OJ21G19-OJ87C10                       | 3    | 8.7  | 23.1 | -0.4 | 0.000 *** | <i>Hd16</i>    |
|                                                                 |           | RM4996-NIAS_Os_aa03000545             | 3    | 4.1  | 10.0 | -0.5 | 0.000 *** |                |
|                                                                 | NARCHRC   | OJ24J17-NIAS_Os_aa03002564            | 3    | 10.7 | 26.4 | -0.8 | 0.000 *** | <i>Hd16</i>    |
|                                                                 |           | RM7285-NIAS_Os_aa08005493             | 8    | 4.5  | 9.6  | -0.4 | 0.002 **  |                |
|                                                                 | NICS      | NIAS_Os_aa10002579-NIAS_Os_aa1002796  | 10   | 4.4  | 9.6  | 0.5  | 0.001 **  |                |
|                                                                 |           | NIAS_Os_aa06000096-RM8101             | 6    | 3.4  | 11.7 | 0.4  | 0.004 **  | <i>Hd17</i>    |
| Lodging degree (LD)                                             | KARC      | RM2593-NIAS_Os_aa03002546             | 3    | 3.7  | 13.3 | 0.3  | 0.000 *** | <i>Hd16</i>    |
| Panicle length (PL)                                             | NICS      | NIAS_Os_aa01004414-NIAS_Os_aa01004804 | 1    | 3.6  | 9.9  | 0.3  | 0.853     | <i>qCL1</i>    |
|                                                                 |           | O007O20-P525F142                      | 6    | 5.5  | 15.4 | -0.4 | 0.000 *** | <i>Hd17</i>    |
| Number of panicles (NOP)                                        | NARCHRC   | RM2309-NIAS_Os_aa12004785             | 12   | 7.1  | 24.2 | -1.0 | 0.087     |                |
| Glume density per panicle (GDP)                                 | KARC      | OJ24J17-NIAS_Os_aa03002564            | 3    | 10.3 | 27.8 | 0.4  | 0.000 *** | <i>Hd16</i>    |
|                                                                 |           | NIAS_Os_aa12004785-NIAS_Os_aa12004855 | 12   | 4.3  | 9.9  | 0.2  | 0.397     |                |
|                                                                 | NARCHRC   | NIAS_Os_aa03002687-RM2187             | 3    | 6.7  | 22.9 | -0.3 | 0.000 *** | <i>Hd16</i>    |
|                                                                 |           | NIAS_Os_aa04007836-NIAS_Os_aa04008763 | 4    | 12.8 | 68.6 | -0.5 | 0.853     |                |
| Flag leaf length (FLL)                                          | NARCHRC   | NIAS_Os_aa07001651-RM3300             | 7    | 3.9  | 28.0 | 0.7  | 0.008 **  |                |
|                                                                 |           | RM2309-NIAS_Os_aa12004785             | 12   | 3.7  | 15.4 | 0.5  | 0.011 *   |                |
| Flag leaf: angle of leaf blade (FLA)                            | NICS      | RM8128-NIAS_Os_aa01009909             | 1    | 5.3  | 13.6 | -0.4 | 0.124     |                |
|                                                                 |           | NIAS_Os_aa03000782-NIAS_Os_aa03000943 | 3    | 5.5  | 14.1 | -0.4 | 0.841     |                |
|                                                                 | NARCHRC   | NIAS_Os_aa10001572-NIAS_Os_aa10001614 | 10   | 4.2  | 10.3 | 0.3  | 0.528     |                |
|                                                                 |           | NIAS_Os_aa03002546-OJ2J24             | 3    | 8.7  | 22.8 | -0.5 | 0.007 **  | <i>Hd16</i>    |
| Panicle exertion length (PEL)                                   | KARC      | O007O20-P525F142                      | 6    | 4.9  | 10.6 | 0.4  | 0.056     | <i>Hd17</i>    |
|                                                                 |           | RM10058-RM10078                       | 1    | 7.5  | 24.2 | -0.6 | 0.061     | <i>qCL1</i>    |
|                                                                 | NICS      | NIAS_Os_aa12004062-NIAS_Os_aa12004300 | 12   | 4.4  | 14.5 | -0.5 | 0.263     |                |
|                                                                 |           | RM8068-NIAS_Os_aa01000855             | 1    | 4.1  | 12.0 | -0.3 | 0.061     | <i>qCL1</i>    |
|                                                                 | NARCHRC   | NIAS_Os_aa03000026-NIAS_Os_aa03000141 | 3    | 3.6  | 10.2 | 0.2  | 0.540     | <i>qCL3-1</i>  |
|                                                                 |           | NIAS_Os_aa12001500-NIAS_Os_aa12001533 | 12   | 4.0  | 11.6 | -0.2 | 0.225     |                |
|                                                                 | NARCHRC   | OJ94O03-4-OJ24J17                     | 3    | 6.6  | 20.3 | -0.5 | 0.000 *** | <i>Hd16</i>    |
|                                                                 |           | NIAS_Os_aa04009913-NIAS_Os_aa04002275 | 4    | 3.7  | 11.2 | -0.3 | 0.054     |                |
| Presence of awns (POA)                                          | NICS      | NIAS_Os_aa04007836-NIAS_Os_aa04008763 | 4    | 9.0  | 40.7 | -0.9 | 0.861     |                |
|                                                                 |           | NIAS_Os_aa03002610-RM1038             | 3    | 18.4 | 51.3 | 0.5  | 0.978     | <i>Hd16</i>    |
| Awn length (AL)                                                 | NICS      | RM14311-NIAS_Os_aa03000026            | 3    | 9.3  | 16.5 | 0.4  | 0.157     |                |
|                                                                 |           | OJ24J17-NIAS_Os_aa03002564            | 3    | 22.4 | 55.1 | 0.8  | 0.179     | <i>Hd16</i>    |
|                                                                 | NARCHRC   | NIAS_Os_aa03000026-NIAS_Os_aa03000141 | 3    | 3.4  | 14.0 | 0.6  | 0.157     |                |
|                                                                 |           | OJ21G19-OJ87C10                       | 3    | 11.8 | 44.2 | 1.8  | 0.000 *** | <i>Hd16</i>    |
| Days to maturity (DTM)                                          | NICS      | OJ24J17-NIAS_Os_aa03002564            | 3    | 25.1 | 62.4 | 3.0  | 0.000 *** | <i>Hd16</i>    |
|                                                                 |           | OJ24J17-NIAS_Os_aa03002564            | 3    | 20.2 | 52.7 | 4.8  | 0.000 *** | <i>Hd16</i>    |
| Plant appearance at maturity stage (AMS)                        | KARC      | OJ94O03-4-OJ24J17                     | 3    | 17.2 | 53.8 | -0.6 | 0.002 **  | <i>Hd16</i>    |
|                                                                 |           | NIAS_Os_aa06001061-NIAS_Os_aa04097-07 | 6    | 3.3  | 10.8 | -0.3 | 0.148     |                |
| Senescence (SNC)                                                | NICS      | NIAS_Os_aa01078-06-NIAS_Os_aa11002340 | 11   | 3.3  | 11.0 | -0.3 | 0.027 *   |                |
|                                                                 |           | OJ24J17-NIAS_Os_aa03002564            | 3    | 10.5 | 28.8 | 0.4  | 0.023 *   | <i>Hd16</i>    |
|                                                                 | NARCHRC   | O007O20-P525F142                      | 6    | 5.5  | 13.7 | 0.3  | 0.064     | <i>Hd17</i>    |
|                                                                 |           | RM10078-NIAS_Os_aa01000431            | 1    | 4.2  | 16.6 | 0.4  | 0.003 **  | <i>qCL1</i>    |
| Pre-harvest sprouting resistance (PHS)                          | NARCHRC   | RM7332-RM14275                        | 3    | 5.6  | 13.6 | 0.5  |           | <i>qLTG3-1</i> |
|                                                                 |           | OJ94O03-4-OJ24J17                     | 3    | 5.3  | 16.3 | -0.6 |           | <i>Hd16</i>    |
|                                                                 | NICS      | NIAS_Os_aa06000223-O007O20            | 6    | 3.7  | 9.4  | 0.4  |           | <i>Hd17</i>    |
|                                                                 |           | OJ24J17-NIAS_Os_aa03002564            | 3    | 17.4 | 53.9 | 7.5  |           | <i>Hd16</i>    |
| Aboveground dry weight (ADW)                                    | KARC      | P548D347-O007O20                      | 6    | 3.4  | 6.0  | -2.5 |           | <i>Hd17</i>    |
| Gross brown rice weight (GBW)                                   | KARC      | OJ24J17-NIAS_Os_aa03002564            | 3    | 13.9 | 41.0 | 1.8  |           | <i>Hd16</i>    |
| Head brown rice weight (HBW)                                    | KARC      | OJ24J17-NIAS_Os_aa03002564            | 3    | 13.1 | 42.8 | 1.7  | 0.541     | <i>Hd16</i>    |
| Weight of aborted rice weight (ARW)                             | KARC      | NIAS_Os_aa02002909-NIAS_Os_aa02003089 | 2    | 3.7  | 10.6 | -0.1 |           |                |
|                                                                 |           | RM7332-RM14275                        | 3    | 5.5  | 16.3 | -0.1 |           |                |
| 1000-grain weight (TGW)                                         | NICS      | RM1284-RM5178                         | 3    | 6.0  | 18.3 | 0.1  |           |                |
|                                                                 |           | RM7365-NIAS_Os_aa03000782             | 3    | 5.3  | 13.5 | -0.3 |           |                |
|                                                                 | NARCHRC   | OJ94O03-4-OJ24J17                     | 3    | 5.6  | 14.5 | -0.3 |           | <i>Hd16</i>    |
|                                                                 |           | NIAS_Os_aa11003846-NIAS_Os_aa11003992 | 11   | 3.2  | 7.9  | 0.3  |           |                |
| Protein content of brown rice (PCB)                             | NICS      | RM6375-NIAS_Os_aa02000772             | 2    | 3.3  | 7.3  | -0.1 |           |                |
|                                                                 |           | NIAS_Os_aa03000545-RM1284             | 3    | 4.2  | 9.1  | 0.1  |           |                |
|                                                                 | KARC      | OJ24J17-NIAS_Os_aa03002564            | 3    | 6.3  | 16.9 | -0.2 |           | <i>Hd16</i>    |
|                                                                 |           | O007O20-P525F142                      | 6    | 6.0  | 15.4 | 0.5  | 0.004 **  | <i>Hd17</i>    |
| Grain appearance (GA)                                           | NARCHRC   | NIAS_Os_aa08005271-NIAS_Os_aa08005354 | 8    | 4.0  | 12.5 | 0.4  | 0.853     |                |
|                                                                 |           | RM4996-NIAS_Os_aa03000545             | 3    | 4.1  | 12.8 | -0.3 | 0.317     |                |
| Normal kernel ratio (NKR)                                       | NICS      | OJ94O03-4-OJ24J17                     | 3    | 9.9  | 28.9 | -0.5 | 0.026 *   | <i>Hd16</i>    |
|                                                                 |           | RM6740-NIAS_Os_aa01006287             | 1    | 4.7  | 12.8 | -1.7 | 0.883     |                |

|                                                                  |          |                                       |    |      |      |      |       |    |      |
|------------------------------------------------------------------|----------|---------------------------------------|----|------|------|------|-------|----|------|
|                                                                  |          | OJ2J24-OJ94O03                        | 3  | 4.6  | 13.3 | 1.4  | 0.035 | *  | Hd16 |
|                                                                  |          | NIAS_Os_aa07007441-RM1364             | 7  | 3.4  | 9.4  | 1.2  | 0.621 |    |      |
|                                                                  |          | NIAS_Os_aa10003630-NIAS_Os_aa10002351 | 10 | 3.1  | 8.6  | 1.4  | 0.196 |    |      |
| White-belly kernel ratio (WBR)                                   | NARCHRC  | OJ94O03-4-OJ24J17                     | 3  | 3.3  | 12.6 | 2.9  | 0.035 | *  | Hd16 |
|                                                                  | NICS     | O007O20-P525F142                      | 6  | 10.3 | 28.8 | 0.4  | 0.853 |    | Hd17 |
|                                                                  | NARCHRC  | RM14275-RM4108                        | 3  | 5.9  | 9.4  | 0.6  | 0.054 |    |      |
|                                                                  |          | NIAS_Os_aa03000545-RM1284             | 3  | 6.5  | 18.9 | -0.8 | 0.007 | ** |      |
| Degree of occurrence of white-back and white-based kernels (DWK) |          | NIAS_Os_aa07006550-NIAS_Os_aa07006642 | 7  | 3.7  | 10.1 | 0.6  | 0.001 | ** |      |
|                                                                  | KARC     | P548D347-NIAS_Os_aa06000223           | 6  | 6.6  | 14.3 | 0.7  |       |    | Hd17 |
|                                                                  |          | NIAS_Os_aa08005271-NIAS_Os_aa08005354 | 8  | 6.8  | 21.7 | 0.8  |       |    |      |
| White-backed and white-based kernel ratio (WKR)                  |          | NIAS_Os_aa11012252-NIAS_Os_aa11003517 | 11 | 6.2  | 18.0 | 0.8  |       |    |      |
|                                                                  | NICS     | NIAS_Os_aa06000223-O007O20            | 6  | 7.7  | 19.6 | 0.4  | 0.061 |    | Hd17 |
|                                                                  | NARCHRC  | OJ24J17-NIAS_Os_aa03002564            | 3  | 7.0  | 18.5 | -1.0 | 0.122 |    | Hd16 |
| Milky-white kernel ratio (MWR)                                   |          | P548D347-NIAS_Os_aa06000223           | 6  | 5.1  | 12.9 | 0.8  | 0.061 |    | Hd17 |
|                                                                  | NARCHRC  | OJ94O03-4-OJ24J17                     | 3  | 6.1  | 14.4 | -0.9 | 0.006 | ** | Hd16 |
|                                                                  |          | P548D347-NIAS_Os_aa06000223           | 6  | 8.6  | 21.5 | 1.1  | 0.001 | ** | Hd17 |
| Leaf blast resistance (LBR)                                      | AARCMARI | NIAS_Os_aa01007008-NIAS_Os_aa01011013 | 1  | 3.8  | 12.2 | -0.4 | 0.009 | ** |      |
|                                                                  | NARCHRC  | NIAS_Os_aa07000458-RM2381             | 7  | 7.5  | 34.2 | 0.5  | 0.398 |    |      |
|                                                                  | TARC     | RM8144-NIAS_Os_aa01007008             | 1  | 3.7  | 12.4 | -0.4 | 0.009 | ** |      |
| Panicle blast resistance (PBR)                                   |          | RM5179-NIAS_Os_aa02001023             | 2  | 4.6  | 22.3 | -0.7 | 0.482 |    |      |
|                                                                  | NICS     | P548D347-NIAS_Os_aa06000223           | 6  | 5.9  | 22.1 | 0.4  | 0.325 |    | Hd17 |
|                                                                  |          | NIAS_Os_aa07005154-NIAS_Os_aa07005253 | 7  | 3.6  | 12.4 | 0.3  | 0.858 |    |      |
|                                                                  |          | NIAS_Os_aa08001283-NIAS_Os_aa08001654 | 8  | 3.7  | 12.6 | -0.3 | 0.263 |    |      |
|                                                                  |          | NIAS_Os_aa08002718-NIAS_Os_aa08005354 | 8  | 3.3  | 11.7 | -0.4 | 0.263 |    |      |
|                                                                  |          | NIAS_Os_aa11002724-NIAS_Os_aa11001785 | 11 | 5.9  | 30.2 | -0.5 | 0.225 |    |      |
|                                                                  | NARCHRC  | RM14275-RM4108                        | 3  | 3.1  | 8.6  | -0.4 | 0.103 |    |      |
| Bacterial leaf blight resistance (BLB)                           |          | NIAS_Os_aa07006550-NIAS_Os_aa07006642 | 7  | 4.5  | 12.9 | 0.5  | 0.858 |    |      |
|                                                                  | MARI     | NIAS_Os_aa01009800-RM8128             | 1  | 4.1  | 12.3 | -0.5 |       |    |      |
|                                                                  |          | NIAS_Os_aa12001721-NIAS_Os_aa12001813 | 12 | 7.0  | 23.4 | -0.6 |       |    |      |

All genetic parameters were calculated by QTL Cartographer ver. 2.5 (Basten *et al.* 2005)

LOD: Log-likelihood value

PVE: Percentage of total phenotypic variance explained by the QTL

AE: Additive effect of Nipponbare allele

G×E: Probability value of *F*-test for interaction effect between each QTL by environments. \*, \*\*, \*\*\* indicate significance at  $P < 0.05$ ,  $P < 0.01$ , and  $P < 0.001$ , respectively.

Nearby QTL: QTLs located near those previously detected in the same BILs by Matsubara *et al.* (2008) (*Hd16* and *Hd17*), Hori *et al.* (2009) (*qCL1* and *qCL3-1*) and Hori *et al.* (2010) (*qLTG3-1*).
