# Supplementary material for: Variation in heading date conceals quantitative trait loci for other traits of importance in breeding selection of rice
Source: PubMed Central journal article supplement — Breed Sci. 2012 Nov 1;62(3):223–34. doi: 10.1270/jsbbs.62.223 (PMC3501939; doi:10.1270/jsbbs.62.223), 2012-11-01
Supplement: jsbbs-62-223-S4.pdf [file jsbbs-62-223-S4.pdf]

**Supplemental Table S3.** Detailed list of 40 QTLs for 27 agronomic traits detected in the 51 Nipponbare/Koshihikari BILs selected by genotypes of nearest markers for the two main heading date QTLs

| Trait name                                                       | Institute | Marker Interval                       | Chr. | LOD  | PVE  | AE    | Nearby QTL                  |
|------------------------------------------------------------------|-----------|---------------------------------------|------|------|------|-------|-----------------------------|
| Leaf color after transplanting in paddy field (LCP)              | NICS      | RM5479-NIAS_Os_aa12005228             | 12   | 4.6  | 22.8 | -0.3  |                             |
| Leaf color at maximum tiller number stage (LCM)                  | NICS      | NIAS_Os_aa07000396-NIAS_Os_aa07000458 | 7    | 3.6  | 19.5 | 0.3   |                             |
| Leaf width at maximum tiller number stage (LWM)                  | KARC      | NIAS_Os_aa07002248-NIAS_Os_aa07002331 | 7    | 3.3  | 11.1 | -0.1  |                             |
|                                                                  | NARCHRC   | NIAS_Os_aa10002796-RM1859             | 10   | 5.9  | 25.8 | 0.3   |                             |
| Leaf color at heading date (LCH)                                 | NICS      | NIAS_Os_aa03000943-NIAS_Os_aa03001017 | 3    | 3.9  | 20.3 | -0.3  |                             |
| Culm length (CL)                                                 | NICS      | RM6331-RM1320                         | 1    | 6.8  | 32.4 | -3.6  | <i>qCL1</i> <sup>†</sup>    |
|                                                                  | NARCHRC   | RM7365-NIAS_Os_aa03000782             | 3    | 3.9  | 21.3 | -2.6  | <i>qCL3-1</i> <sup>†</sup>  |
| Culm stiffness (CSF)                                             | NARCHRC   | RM1284-RM5178                         | 3    | 4.1  | 20.0 | -0.6  |                             |
| Lodging degree (LD)                                              | NICS      | NIAS_Os_aa04007307-NIAS_Os_aa04007380 | 4    | 6.3  | 35.2 | -0.7  |                             |
|                                                                  | NARCHRC   | NIAS_Os_aa10003122-NIAS_Os_aa10003343 | 10   | 4.4  | 23.3 | -0.1  |                             |
| Number of panicles (NOP)                                         | NARCHRC   | RM7365-NIAS_Os_aa03000782             | 3    | 5.9  | 31.3 | -0.8  |                             |
| Flag leaf length (FLL)                                           | NARCHRC   | NIAS_Os_aa04002834-NIAS_Os_aa04003265 | 4    | 4.1  | 23.7 | -0.5  |                             |
| Flag leaf: angle of leaf blade (FLA)                             | KARC      | RM7365-NIAS_Os_aa03000782             | 3    | 6.2  | 30.3 | -0.7  | <sup>†</sup>                |
|                                                                  | NICS      | RM7365-NIAS_Os_aa03000782             | 3    | 8.9  | 46.3 | -0.8  | <sup>†</sup>                |
| Panicle exertion length (PEL)                                    | KARC      | RM10078-NIAS_Os_aa01000431            | 1    | 4.5  | 16.0 | -0.7  | <i>qCL1</i> <sup>†</sup>    |
|                                                                  | NICS      | RM4959-RM1282                         | 1    | 4.2  | 18.3 | -0.4  | <i>qCL1</i> <sup>†</sup>    |
| Presence of awns (POA)                                           | NARCHRC   | RM14311-RM3372                        | 3    | 7.8  | 37.9 | 1.1   |                             |
| Awn length (AL)                                                  | NICS      | RM14311-RM3372                        | 3    | 15.0 | 56.9 | 0.4   | <sup>†</sup>                |
| Senescence (SNC)                                                 | NICS      | NIAS_Os_aa11002433-NIAS_Os_aa11002529 | 11   | 4.3  | 22.3 | -0.3  | <sup>†</sup>                |
|                                                                  | NARCHRC   | RM3873-B1066G12                       | 1    | 6.1  | 24.1 | 0.5   |                             |
|                                                                  | NARCHRC   | NIAS_Os_aa08000907-NIAS_Os_aa08001066 | 8    | 5.6  | 21.6 | -0.4  |                             |
| Pre-harvest sprouting resistance (PHS)                           | NARCHRC   | RM14240-RM7332                        | 3    | 8.8  | 44.6 | 0.6   | <i>qLTG3-1</i> <sup>†</sup> |
| Aboveground dry weight (ADW)                                     | NICS      | RM7365-NIAS_Os_aa03000782             | 3    | 4.2  | 22.3 | -4.3  |                             |
| Head brown rice weight (HBW)                                     | NICS      | NIAS_Os_aa03000545-RM1284             | 3    | 4.0  | 19.6 | -17.2 |                             |
| 1000-grain weight (TGW)                                          | NICS      | RM3779-RM4996                         | 3    | 5.2  | 20.5 | -0.4  |                             |
|                                                                  | NARCHRC   | NIAS_Os_aa07005384-NIAS_Os_aa07007604 | 7    | 5.0  | 17.9 | -0.4  |                             |
| Protein content of brown rice (PCB)                              | NICS      | RM6375-NIAS_Os_aa02000772             | 2    | 3.8  | 17.8 | -0.2  | <sup>†</sup>                |
| Grain appearance (GA)                                            | KARC      | RM3372-RM7072                         | 3    | 4.8  | 19.7 | -0.4  |                             |
|                                                                  | NARCHRC   | NIAS_Os_aa11012252-NIAS_Os_aa11003517 | 11   | 4.2  | 20.0 | 0.4   |                             |
| Degree of occurrence of white-back and white-based kernels (DWK) | KARC      | NIAS_Os_aa08005354-NIAS_Os_aa08006464 | 8    | 5.9  | 29.3 | 0.9   | <sup>†</sup>                |
|                                                                  | NARCHRC   | NIAS_Os_aa11012252-NIAS_Os_aa11003517 | 11   | 5.7  | 27.4 | 0.8   | <sup>†</sup>                |
| Normal kernel ratio (NKR)                                        | NICS      | NIAS_Os_aa07007132-NIAS_Os_aa07007267 | 7    | 4.4  | 22.0 | 1.8   | <sup>†</sup>                |
|                                                                  | NARCHRC   | NIAS_Os_aa11002529-NIAS_Os_aa11002695 | 11   | 5.4  | 27.9 | -2.7  |                             |
| White-backed and white-based kernel ratio (WKR)                  | NARCHRC   | NIAS_Os_aa03002146-NIAS_Os_aa03002208 | 3    | 7.8  | 33.9 | 1.2   |                             |
| Milky-white kernel ratio (MWR)                                   | NICS      | NIAS_Os_aa03000864-NIAS_Os_aa03000943 | 3    | 3.6  | 18.7 | 0.3   |                             |
| Leaf blast resistance (LBR)                                      | AARCMARI  | NIAS_Os_aa01008361-NIAS_Os_aa01008754 | 1    | 3.8  | 17.6 | -0.5  | <sup>†</sup>                |
| Panicle blast resistance (PBR)                                   | NARCHRC   | NIAS_Os_aa01008968-RM1349             | 1    | 4.2  | 14.3 | -0.6  |                             |
|                                                                  | NARCHRC   | RM14275-RM4108                        | 3    | 6.3  | 23.8 | -0.6  | <sup>†</sup>                |
|                                                                  | NARCHRC   | NIAS_Os_aa07006550-NIAS_Os_aa07006642 | 7    | 5.2  | 19.0 | 0.6   | <sup>†</sup>                |
| Bacterial leaf blight resistance (BLB)                           | MARI      | NIAS_Os_aa12001721-NIAS_Os_aa12001813 | 12   | 4.1  | 19.0 | -0.6  | <sup>†</sup>                |

All genetic parameters were calculated by QTL Cartographer ver. 2.5 (Basten *et al.* 2005).

LOD: Log-likelihood value

PVE: Percentage of total phenotypic variance explained by the QTL

AE: Additive effect of Nipponbare allele

Nearby QTL: QTLs located near those previously detected in the same BILs by Matsubara *et al.* (2008) (*Hd16* and *Hd17*), Hori *et al.* (2009) (*qCL1* and *qCL3-1*) and Hori *et al.* (2010) (*qLTG3-1*). <sup>†</sup> indicates the QTLs located near those detected in the 100 BILs.
